1 TITLE:

2 Dense granule protein, GRA64 interacts with host cell ESCRT proteins during *Toxoplasma*  
3 *gondii* infection

4

5 RUNNING TITLE:

6 GRA64 interacts with host ESCRT

7

8 AUTHORS:

9 Joshua Mayoral<sup>1,\*</sup>, Rebekah B. Guevara<sup>1,\*</sup>, Yolanda Rivera-Cuevas<sup>&</sup>, Vincent Tu<sup>1</sup>, Tadakimi  
10 Tomita<sup>1</sup>, Julia Romano<sup>§</sup>, Leslie Gunther-Cummins<sup>2</sup>, Simone Sidoli<sup>3</sup>, Isabelle Coppens<sup>§</sup>, Vernon  
11 B. Carruthers<sup>&</sup>, Louis M. Weiss<sup>1,4,#</sup>

12

13 Departments of <sup>1</sup>Pathology, <sup>2</sup>Anatomy and Structural Biology, <sup>3</sup>Biochemistry and <sup>4</sup>Medicine,  
14 Albert Einstein College of Medicine, Bronx, NY, 10461, USA.

15 <sup>&</sup>Department of Microbiology and Immunology, University of Michigan Medical School, Ann  
16 Arbor, MI, 48109, USA.

17 <sup>§</sup>Department of Molecular Microbiology and Immunology, Johns Hopkins Bloomberg School of  
18 Public Health, Baltimore, MD, 21205, USA.

19 \*These authors contributed equally.

20 #Corresponding author, Albert Einstein College of Medicine, 1300 Morris Park Avenue, Bronx,  
21 NY, 10461, USA [louis.weiss@einsteinmed.org](mailto:louis.weiss@einsteinmed.org)

22

23 Abstract Word Count: 198

24 Importance Word Count: 122

25 Article Word Count: 4775

26 Keywords: Dense granule protein, GRA, ESCRT, membrane transport, bradyzoite, *Toxoplasma*

27

28 **ABSTRACT**

29 The intracellular parasite *Toxoplasma gondii* adapts to diverse host cell environments within a  
30 replicative compartment that is heavily decorated by secreted proteins. In attempts to identify  
31 novel parasite secreted proteins that influence host cell activity, we identified and characterized a  
32 trans-membrane dense granule protein dubbed GRA64 (TGME49\_202620). We found that  
33 GRA64 is on the parasitophorous vacuolar membrane (PVM) and is partially exposed to the host  
34 cell cytoplasm in both tachyzoite and bradyzoite parasitophorous vacuoles. Using co-  
35 immunoprecipitation and proximity-based biotinylation approaches, we demonstrate that GRA64  
36 appears to interact with certain components of the host Endosomal Sorting Complexes Required  
37 for Transport (ESCRT). Genetic disruption of GRA64 does not affect acute *Toxoplasma*  
38 virulence in mice nor encystation as observed via tissue cyst burdens in mice during chronic  
39 infection. However, ultrastructural analysis of  $\Delta gra64$  tissue cysts using electron tomography  
40 revealed enlarged vesicular structures underneath the cyst membrane, suggesting a role for  
41 GRA64 in organizing the recruitment of ESCRT proteins and subsequent intracystic vesicle  
42 formation. This study uncovers a novel host-parasite interaction that contributes to an emerging  
43 paradigm in which specific host ESCRT proteins are recruited to the limiting membranes  
44 (PVMs) of tachyzoite and bradyzoite vacuoles formed during acute and chronic *Toxoplasma*  
45 infection.

46

47

48

49 **IMPORTANCE**

50

51 *Toxoplasma gondii* is a widespread foodborne parasite that causes congenital disease and life-  
52 threatening complications in immune compromised individuals. Part of this parasite's success  
53 lies in its ability to infect diverse organisms and host cells, as well as to persist as a latent  
54 infection within parasite constructed structures called tissue cysts. In this study, we  
55 characterized a protein secreted by *T. gondii* into its parasitophorous vacuole during intracellular  
56 infection, which we dub GRA64. On the vacuole, this protein is exposed to the host cell and  
57 interacts with specific host ESCRT proteins. Parasites lacking the GRA64 protein exhibit  
58 ultrastructural changes in tissue cysts during chronic infection. This study lays the foundation  
59 for future studies on the mechanics and consequences of host ESCRT-parasite protein  
60 interactions.

61

62

## 63 INTRODUCTION

64 The intracellular parasite *Toxoplasma gondii* is a widespread pathogen estimated to infect  
65 approximately one-third of human beings worldwide (1). The extensive prevalence of *T. gondii*  
66 can be partially attributed to its flexible life cycle, one in which a wide variety of hosts can be  
67 infected most commonly by the ingestion of material containing parasites within cystic structures  
68 (2, 3). Within intermediate hosts (where asexual replication occurs), *T. gondii* interconverts  
69 between two life stages that typify acute and chronic infection (4). The tachyzoite life stage  
70 spreads throughout the body of the host during acute infection and causes disease through the  
71 lysis of host cells and subsequent tissue damage, whereas the bradyzoite life-stage exhibits a  
72 quasi-dormant existence within intracellular tissue cysts predominately in the brain and muscle  
73 tissue during chronic infection (5). Bradyzoite differentiation is induced by various factors that  
74 can be summarized as stressors to the parasite which trigger a bradyzoite transcriptional program  
75 and an altered pattern of intracellular replication (6, 7). The absence of stressors, as might occur  
76 in the setting of compromised host immunity, is a permissive state that allows for bradyzoite re-  
77 conversion back to the tachyzoite stage, leading to life-threatening encephalitis and other  
78 complications (8, 9). As there are currently no available treatments that eradicate tissue cysts  
79 from chronically infected hosts, there is a major need to understand the processes that contribute  
80 to parasite latency.

81 Both tachyzoite and bradyzoite life stages replicate within specialized intracellular  
82 vacuoles termed either the parasitophorous vacuole (during tachyzoite infection) or the tissue  
83 cyst (during bradyzoite infection) (4). Parasitophorous vacuoles and tissue cysts are extensively  
84 modified by the parasites within these compartments through the secretion of lipids and proteins  
85 into the vacuolar space and cyst matrix (10, 11). For example, the secretion of multi-lamellated

86 vesicles from the basal end of tachyzoites gives rise to the intravacuolar network (IVN) (12),  
87 which is known to play a pivotal role in the acquisition of host cell resources (13, 14). A  
88 seemingly analogous structure, the intracystic network, has been described in tissue cysts as well  
89 (11). The defining feature of tissue cysts historically has been the cyst wall, which appears as an  
90 electron dense conglomeration of vesicular and filamentous material that underlies the cyst  
91 membrane (11). Despite the ultrastructural characterization of the tachyzoite parasitophorous  
92 vacuole and bradyzoite tissue cysts, much remains to be discovered regarding the number and  
93 function of the proteins secreted into these specialized vacuoles and their contribution to  
94 parasitism. Many of the proteins found either in a soluble or insoluble, membrane-associated  
95 state arise from secretory organelles termed dense granules (15), which constitutively release  
96 “GRA” proteins throughout intracellular development (16). Many GRA proteins do not contain  
97 domains of known function, suggesting that novel processes unique to the parasite’s intracellular  
98 niche might be mediated by these proteins.

99         Despite their enigmatic nature, the function of very few GRA proteins have been  
100 elucidated in vesicle trafficking and nutrient acquisition. GRA2 and GRA6 are pivotal in  
101 forming the IVN during the early stages of tachyzoite parasitophorous vacuole development  
102 (17). GRA7 sequesters host endocytic organelles to the parasitophorous vacuole membrane  
103 (PVM) (18). GRA3 recruits host Golgi and aids in the trafficking of Golgi vesicles across the  
104 PVM (19), and MAF1 recruits and tethers host mitochondria to the PVM (20). GRA17 and  
105 GRA23 have been shown to traffic small molecules across the PVM (21), and it is suspected that  
106 GRA17 serves the same purpose during bradyzoite development (22). Recently discovered is the  
107 interaction between GRA14 and the host Endosomal Sorting Complex Required for Transport  
108 (ESCRT) machinery, which mediates ESCRT-dependent virus-like particle budding and

109 internalization of host cytosolic proteins at the PVM (23). Certain GRA proteins have been  
110 shown to be partially exposed to the host cell following their transmembrane insertion into the  
111 PVM, such as GRA5 (24), GRA6 (25), and GRA14 (26). GRA6 has been shown to influence  
112 host cell NFAT activity (27), while a specific GRA15 allele has been shown to induce host cell  
113 NF- $\kappa$ B activity (28), presumably through host cell exposure of GRA15 at the PVM. Although  
114 GRA15 is the main regulator of NF- $\kappa$ B, GRA7 and GRA14 also modify nuclear localization of  
115 RelA/p65, a member of the NF- $\kappa$ B, complex, from the PVM (29). Certain GRA proteins have  
116 even been found to operate beyond the PVM interface, entering the host cell cytoplasm and  
117 nucleus and influencing host cell function by interacting with specific host cell proteins (30, 31).

118 In efforts to identify novel secreted *Toxoplasma* proteins that may directly influence host  
119 cell activity, we devised an *in silico* screen to predict genes encoding proteins with properties  
120 similar to known exported effector proteins. We identified one protein from this screen secreted  
121 into the vacuole, but not beyond the PVM or cyst membrane, likely due to the presence of a  
122 transmembrane domain. We set about characterizing this novel protein, TGME49\_202620  
123 (dubbed GRA64), in detail and found that its N-terminus is exposed to the host cell during  
124 intracellular infection. Co-immunoprecipitation and proximity-based biotinylation approaches  
125 revealed that the most frequent host cell interacting partners of GRA64 are components of the  
126 Endosomal Sorting Complexes Required for Transport (ESCRT), which canonically generate  
127 intraluminal vesicles away from the cytosol following their stepwise recruitment. Genetic  
128 deletion of GRA64 did not impair tachyzoite growth, nor did it impact cyst burden during  
129 chronic infection. Ultrastructural analysis, however, of  $\Delta gra64$  tissue cysts demonstrated  
130 enlarged cyst membrane adjacent intraluminal vesicles compared to wild type tissue cysts.  
131 Electron tomography of  $\Delta gra64$  tissue cysts revealed these enlarged intraluminal vesicles to be

132 cyst membrane invaginations, suggesting perturbed ESCRT-mediated scission events at the cyst  
133 membrane in the absence of GRA64. However, unlike GRA14 (23), GRA64 neither participates  
134 in ESCRT-dependent virus like particle budding nor regulates ingestion of host cytosolic  
135 proteins. Altogether, our findings suggest that GRA64 is one of several membrane bound GRA  
136 proteins facing the host cell that recruits host ESCRT, the consequences of which have yet to be  
137 fully understood.

138

## 139 **RESULTS**

140 **Discovery of a novel GRA protein, GRA64.** The gene TGME49\_202620 was identified from  
141 an *in silico* screen aimed at characterizing novel exported parasite effector proteins. The gene is  
142 predicted to encode a protein containing a signal peptide and a transmembrane domain proximal  
143 to the C-terminus (Fig. 1A). As assessed by the webserver IUPred3 (32), the gene product is  
144 predicted to contain regions of protein intrinsic disorder (Fig. 1B), suggesting the capability of  
145 promiscuous protein-protein interactions. The low disordered regions correspond to the signal  
146 peptide and the transmembrane domain of TGME49\_202620 (Fig. 1B). Endogenously tagged  
147 PruQ parasites were engineered with a 3xHA tag appended to the C-terminus of  
148 TGME49\_202620, upstream of the stop codon. Immunofluorescence assays (IFAs) of C-  
149 terminus tagged TGME49\_202620 protein demonstrate secretion into the lumen of the  
150 parasitophorous vacuole, where it was frequently found to outline the parasitophorous vacuole  
151 membrane (PVM) under tachyzoite growth conditions using Type II Pru $\Delta ku80\Delta hxp1rt$  (PruQ)  
152 parasites (Fig. 1C, top panel). Endogenously tagged PruQ parasites were engineered with a  
153 3xHA tag appended to the N-terminus of TGME49\_202620, downstream of the predicted signal

154 peptide. IFAs of extracellular parasites from this strain revealed that the TGME49\_202620  
155 protein co-localizes with the dense granule marker GRA1, indicating that this protein is likely  
156 packaged into dense granules prior to secretion into the parasitophorous vacuole (Fig. 1C,  
157 bottom panel). Given this result, we hereafter refer to the TGME49\_202620 gene product as  
158 GRA64. To assess the localization of GRA64 more accurately during intracellular infection,  
159 immunoelectron microscopy of tachyzoite vacuoles was performed. The images demonstrate  
160 that GRA64 signal is most frequently detected in association with membranous tubular structures  
161 reminiscent of the intravacuolar network (IVN) (Fig. 1D). No PVM labeling was observed in  
162 this experiment, although the integrity of the PVM appeared to be compromised during the  
163 preparation of these samples likely due to the use of Triton X-100. To determine whether the  
164 predicted transmembrane domain conferred membrane interacting properties to GRA64,  
165 fractionation experiments were performed using material from infected monolayers containing  
166 tachyzoites. GRA64 was found to predominately associate with the high-speed pellet fraction,  
167 with only trace amounts present in the high-speed supernatant (Fig. 1E). Treatment with 6M  
168 Urea, 1M NaCl, 0.1M Na<sub>2</sub>CO<sub>2</sub>, 0.1% NP-40, and 0.1% Triton X-100 revealed that only 6M urea  
169 and non-ionic detergents (NP-40, Triton X-100) were capable of dissociating modest amounts of  
170 GRA64 protein from the high-speed pellet fraction, indicating that GRA64 exhibits integral  
171 membrane protein properties (Fig. 1E), similar to what has been described for other GRA  
172 proteins with transmembrane domains such as GRA5 (24). The immunoblot shown in Fig. 1E  
173 demonstrates that GRA64 typically migrates slightly below 55kDa, slightly slower than the  
174 predicted size of ~39kDa. GRA64 has a predicted *N*-glycosylation site at amino acid 55 and  
175 several phosphorylation sites detected in prior proteomic datasets deposited onto the *Toxoplasma*  
176 database ToxoDB (33), and this could account for slower migration together with the



177 intrinsically disordered structure predicted by IUPred3. No differences were observed in GRA64  
178 migration from protein harvested from extracellular parasites, a 24-hour infected tachyzoite  
179 culture, or a 3-day induced bradyzoite culture (data not shown).

180

181 **N-terminus of GRA64 is exposed to the host cell cytoplasm during intracellular infection.**

182 We hypothesized that GRA64 is exposed to the host cell cytoplasm following insertion of the  
183 transmembrane domain into the lipid membranes of the PVM or IVN. Parasites expressing an  
184 N-terminal HA tagged version of GRA64 at the endogenous locus were used in selective  
185 permeabilization IFA experiments (Fig. 2A schematic). At the digitonin concentration of  
186 0.001% (w/v) to selectively permeabilize the host cell plasma membrane but not the PVM to  
187 antibodies, GRA64 signal was detected in intact parasitophorous vacuoles, as assessed by the  
188 lack of labeling of MAG1, an abundant vacuolar protein (Fig. 2A, Digitonin Perm panels).  
189 GRA64 exposure to the host cell cytoplasm was detected both under tachyzoite (pH7) and  
190 bradyzoite (pH8) growth conditions (Fig. 2A).

191         With the aim of eventually identifying host cell proteins that potentially interact with  
192 GRA64, parasites expressing a TurboID-GRA64 fusion protein were engineered. The  
193 proximity-based biotinylating enzyme TurboID (34) and a 3xHA epitope tag were appended to  
194 the N-terminus of endogenous GRA64 (Fig. 2B, schematic). To assess whether the addition of  
195 the TurboID tag interfered with the topology of the GRA64 protein, selective permeabilization  
196 experiments were again performed with this parasite strain under bradyzoite growth conditions  
197 supplemented with exogenous biotin. TurboID-GRA64 fusion protein was also detected in intact  
198 parasitophorous vacuoles, as determined by the detection of 3xHA signal in vacuoles without

199 MAG1 signal (Fig. 2B). Biotinylation was also detected in intact parasitophorous vacuoles using  
200 anti-biotin antibody, indicating that the TurboID enzyme is also active specifically at the host  
201 cell exposed vacuolar membrane interface. Hence, the N-terminal portion (with respect to the  
202 predicted transmembrane domain) of various GRA64 fusion proteins appears to be consistently  
203 exposed to the host cell cytoplasm.

204

205 **GRA64 interacts with host cell proteins from the Endosomal Sorting Complexes Required**  
206 **for Transport (ESCRT).** Given the host cell exposure of GRA64, we hypothesized that certain  
207 host cell proteins may interact with the GRA64 protein. Co-immunoprecipitations (Co-IPs) were  
208 performed using protein lysates from tachyzoite-infected human fibroblast cultures, using PruQ  
209 parasites expressing endogenously tagged 3xHA-GRA64 protein (24 hours post-infection). Co-  
210 IPs of GRA64 in protein lysates from bradyzoite-infected human fibroblasts (four days post-  
211 infection) and from mouse primary cortical neuron infected cultures (two days post-infection)  
212 were also performed, to determine if any host cell protein associations were common between  
213 life stages and host cell type, as well as between different host species. Untagged PruQ parasites  
214 cultured under the same conditions were used as a negative control for all experiments to identify  
215 proteins that non-specifically bound to the anti-HA antibody coated magnetic beads. Two  
216 independent experiments were performed for each condition. Following overnight incubation of  
217 harvested proteins with anti-HA magnetic beads, protein was washed, eluted with Laemmli  
218 buffer, removed from detergent and digested into peptides in S-TRAP columns, and analyzed by  
219 LC-MS/MS.

220           Among the parasite proteins significantly enriched from tachyzoite infected fibroblast  
221 samples ( $\log_2$  fold-enrichment  $\geq 1.0$ , p-value  $\leq 0.10$  in two independent experiments), various  
222 GRA proteins were identified, as expected based on the localization of GRA64 in the vacuole  
223 and presence in dense granules within the parasite (Fig. 1C). The only host cell proteins  
224 significantly enriched from tachyzoite infected fibroblast samples were various proteins  
225 belonging to or associated with the endosomal sorting complexes required for transport (ESCRT)  
226 (Fig. 3). Specifically, representatives from the ESCRT-I (TSG101, VPS37A, VPS28) and  
227 ESCRT-III (CHMP4B) complex were enriched in most Co-IP experiments (Fig. 3A-C), as well  
228 as proteins associated with ESCRT recruitment (PDCD6 and UMAD1). However, it is worth  
229 noting that GRA64 was not detected as significantly enriched in the neuron Co-IPs (Fig. 3C),  
230 likely due to low protein enrichment overall from neuron infected cultures, resulting in greater  
231 variability in the LC-MS/MS analysis pipeline. Despite the absence of significant bait-protein  
232 enrichment in the neuron experiment, the data demonstrate that similar parasite and host cell  
233 proteins to those found from fibroblast cultures are significantly enriched (GRA proteins and  
234 ESCRT proteins), indicating an intriguing common recruitment of host proteins at the IVN/PVM  
235 interface (and analogous structures in tissue cyst) across each condition tested.

236           The Co-IP approach necessitates the lysis of host cells to immunoprecipitate GRA64  
237 protein from the parasitophorous vacuole, which may lead to artificial interactions that do not  
238 normally occur during infection. To determine if ESCRT protein proximity to GRA64 could be  
239 detected in living cells, we utilized proximity-based biotinylation with TurboID, using the afore-  
240 mentioned TurboID-GRA64-expressing parasite strain (Fig. 2B) and an untagged parasite strain  
241 as a control. Streptavidin resin was used to enrich biotinylated proteins in two independent  
242 experiments, harvesting proteins from bradyzoite-induced cultures with exogenous biotin three

243 days post-infection. The results demonstrated that three ESCRT-I proteins (TSG101, VPS37A,  
244 UBAP1) and the accessory ESCRT protein ALIX were identified as significantly enriched ( $\log_2$   
245 fold-enrichment  $\geq 1.5$ , p-value  $\leq 0.1$ ) in TurboID-GRA64 cultures compared to untagged  
246 cultures grown under similar conditions in both independent experiments (Fig. 3D). Hence, both  
247 Co-IP and TurboID approaches provide evidence for an association between GRA64 and host  
248 ESCRT proteins. TurboID labeling experiments were also performed during infection in mouse  
249 primary cortical neurons. No host proteins were found to be significantly enriched in TurboID  
250 labeled samples in two independent experiments with neurons, despite evidence for successful  
251 TurboID labeling based on the significant enrichment of parasite proteins (Fig. S1). Host  
252 proteins may have been less efficiently labeled during neuron infection due to relatively lower  
253 amounts of host proteins associated with vacuolar membranes compared to the fibroblast  
254 infection model.

255 To help validate the results obtained by LC-MS/MS, 3xHA-GRA64 pulldowns with anti-  
256 HA beads were repeated under tachyzoite growth conditions in human foreskin fibroblast  
257 cultures and during neuron infection (Fig. 4A). A clear enrichment of TSG101 and PDCD6 were  
258 observed in the human foreskin fibroblast infection eluates from 3xHA-GRA64 samples, but not  
259 untagged control eluates (Fig. 4A, left panel). Similarly, PDCD6 was found to be enriched by  
260 GRA64 pulldown during neuron infection (Fig. 4A, right panel), confirming LC-MS/MS  
261 findings. A reciprocal Co-IP was also performed using antibody to the ESCRT-III protein  
262 CHMP4B, conjugated to magnetic dynabeads. As a control, unconjugated dynabeads were used  
263 in parallel. Incubating control and CHMP4B conjugated magnetic beads with tachyzoite  
264 infected cultures expressing 3xHA-tagged GRA64 protein demonstrated CHMP4B enrichment  
265 of GRA64 over control beads after several wash steps and elution, as determined by

266 immunoblotting (Fig. 4B). These data suggest that the interaction between GRA64 and  
267 CHMP4B is reproducible, at least during the artificial Co-IP cell lysis and wash conditions used  
268 in this experiment. Altogether, LC-MS/MS results and pulldowns with GRA64 and CHMP4B  
269 demonstrate that GRA64 interacts with specific ESCRT-I, ESCRT-III, and accessory ESCRT  
270 proteins.

271

272 **Genetic disruption of GRA64 does not affect tachyzoite growth *in vitro* and in mice nor cyst**  
273 **burden in mice during chronic infection.** To determine how GRA64 might contribute to  
274 parasite fitness, we next disrupted and complemented the GRA64 gene in PruQ parasites using a  
275 previously described Cas9 strategy (35). Immunoblots of protein lysates from each strain  
276 revealed, as expected, the absence of 3xHA-GRA64 protein in the  $\Delta gra64$  and comparable  
277 amounts of GRA64 protein in the parental (3xHA-GRA64) and complemented (GRA64-COMP)  
278 strains (Fig. S2A). Neither *in vitro* growth in fibroblasts (determined by plaque assays, Fig.  
279 S2B) nor acute virulence *in vivo* (Fig. S2C) was affected in PruQ $\Delta gra64$  parasites, indicating  
280 that GRA64 is dispensable for tachyzoite growth. We next assessed cyst burdens in CBA/J mice  
281 chronically infected with PruQ strain parasites 30 days post-infection. In two independent  
282 experiments, we observed a trend for reduced cyst burdens in mouse brains infected with the  
283  $\Delta gra64$  PruQ strain, compared to the parental and complemented counterparts (Fig. S3A). To  
284 further evaluate the cyst phenotype, in two independent experiments we quantified cyst burden in  
285 equivalent GRA64 strains generated in the relatively more cystogenic ME49 $\Delta ku80\Delta hxgppt$   
286 (ME49Q) background. The results showed an overall increase in cyst yields, but no difference in  
287 ME49Q $\Delta gra64$  cyst burdens compared to the complemented strain. Altogether, the data suggest  
288 GRA64 does not significantly influence cyst burden in a predictable manner (Fig. S3B).

289

290 **Tissue cysts formed by  $\Delta gra64$  parasites demonstrate changes in cyst ultrastructure.** We  
291 next evaluated the localization of GRA64 in tissue cysts formed *in vivo*. Immunogold labeling of  
292 complemented GRA64 cysts expressing 3xHA-GRA64 revealed labeling of the cyst wall region  
293 and parasite dense granules using anti-HA antibody, providing evidence that GRA64 is indeed  
294 expressed by mature bradyzoites *in vivo* (Fig. 5A). Furthermore, we assessed whether tissue  
295 cysts formed *in vivo* by  $\Delta gra64$  parasites exhibited any morphological defects related to GRA64-  
296 ESCRT interaction. We hypothesized that defects in the recruitment of host ESCRT proteins at  
297 the cyst membrane interface could result in more prominent “stalled” cyst membrane  
298 invaginations, due to the lack of efficient ESCRT-mediated membrane scission. Using the wild-  
299 type (ME49Q), GRA64 parental (3xHA-GRA64), GRA64 knockout ( $\Delta gra64$ ), and  
300 complemented (GRA64-COMP) ME49Q strains, we harvested and purified cysts by Percoll  
301 from mouse brains chronically infected for four weeks. Post-purification and fixation, cysts  
302 were analyzed by electron microscopy. The images revealed that while wildtype, parental, and  
303 complemented cysts exhibited standard cyst wall architecture typified by electron dense material  
304 and occasionally small vesicular material underneath the cyst membrane, however  $\Delta gra64$  cysts  
305 more frequently harbored large vesicular structures (200-400nm) proximal to the cyst membrane  
306 (Fig. 5B). To further investigate the large vesicular structures, we performed electron tomogram  
307 analysis of thicker sections from *in vivo* brain cysts (250nm) of ME49Q (Movie 1) and  $\Delta gra64$   
308 (Movie 2). The ME49Q tomogram demonstrates narrow cyst membrane invaginations with  
309 occasional vesicles trapped within the lumen of these invaginations. We further traced the  
310 vesicular structures in the  $\Delta gra64$  tomogram to see if they were continuous with the cyst  
311 membrane and observed a few close vesicular-cyst membrane contacts (Fig. S4). These large

312 vesicular structures potentially represent enlarged invaginations that have not been efficiently  
313 excised from the cyst membrane due to perturbed ESCRT recruitment. However, we cannot  
314 conclude with certainty the nature of these seemingly aberrant structures from static images  
315 alone.

316

317 **GRA64 does not recruit ESCRT machinery in virus-like particle assay and is not required**  
318 **for internalization of host cytosolic proteins.** The parasitophorous vacuole transmembrane  
319 protein, GRA14, can mediate ESCRT-dependent HIV-1 virus-like particle (VLP) budding and  
320 internalization of host cytosolic proteins (23). Given the prominent “stalled” intraluminal  
321 vesicles within  $\Delta gra64$  tissue cysts, we investigated if host ESCRT components are recruited to  
322 the parasitophorous vacuole in a GRA64-dependent manner to facilitate vesicle formation. To  
323 that end, we performed a HIV-1 VLP assay as a functional readout to assess GRA64-dependent  
324 ESCRT recruitment for HIV-1 VLP release. The HIV-1 Gag p6 domain encoding late domain  
325 motifs necessary for ESCRT recruitment was substituted for the GRA64 N-terminal capable of  
326 interacting with the host ESCRT machinery (GagGRA64). Deletion of the HIV-1 Gag p6  
327 domain impaired VLP release as previously observed; however, expression of GagGRA64 did  
328 not produce VLPs as efficiently as HIV-1 Gag or GagGRA14 (Fig. 6A).

329 To further assess the role of GRA64 in vesicular trafficking across the PVM we analyzed  
330 internalization of host cytosolic proteins in GRA64-deficient parasites. Inducible mCherry HeLa  
331 cells were infected with type II PRU parasites with (PRUQ $\Delta gra64$ ::GRA64) or without  
332 GRA64(PRUQ $\Delta gra64$ ). The infected cells were treated with the cathepsin L inhibitor LHVS  
333 prior to harvest at 24 hours post-infection to allow for accumulation of host-derived mCherry

334 within the parasite's endolysosomal system. The percentage of mCherry-containing parasites  
335 was not reduced in  $\Delta gra64$  parasites compared to complemented parasites suggesting that  
336 GRA64 alone is not required for the uptake of host cytosolic proteins in replicating parasites  
337 (Fig. 6B).

338

## 339 **DISCUSSION**

340 *Toxoplasma* serially secretes effector proteins from the micronemes, rhoptries, and dense  
341 granule organelles that aid in invasion, immune suppression, vacuole remodeling, and nutrient  
342 acquisition (16). Secreted effectors in both tachyzoite and bradyzoite stages traffic to the PVM  
343 or cyst membrane/wall and beyond to the host cell cytosol and nucleus (36, 37). Here, we aimed  
344 to identify novel effector proteins using an *in silico* screen to identify gene products with similar  
345 properties to known exported effectors and identified a novel dense granule protein (GRA),  
346 GRA64. Although GRA64 does not fully translocate across the PVM or cyst membrane and into  
347 the host cell as a soluble protein, it does reside at the PVM with the N-terminus exposed to the  
348 host cytoplasm. The PVM and cyst membrane are an active parasite/host interface and we  
349 observed that GRA64 co-immunoprecipitates with host Endosomal Sorting Complex Required  
350 for Transport (ESCRT) components and other parasite GRA proteins during tachyzoite and  
351 bradyzoite-staged infection. Proximity-based biotinylation with TurboID also demonstrated  
352 ESCRT-proximal proteins within living cells during bradyzoite growth conditions. In addition,  
353 GRA64-deficient brain cysts exhibited an abnormal cyst wall structure with enlarged vesicular  
354 structures. However, unlike GRA14, GRA64 was unable to substitute the HIV-1 Gag ESCRT-  
355 interacting domain to mediate virus-like particle (VLP) release, and GRA64 appears to be



356 dispensable for the internalization of host cytosolic proteins at least under tachyzoite growth  
357 conditions (23). However, it is possible that GRA64 recruits the host ESCRT machinery to the  
358 parasitophorous vacuole for ESCRT functions at the PVM that remain to be elucidated. This is  
359 supported by the fact that the ESCRT accessory protein ALIX is still present at the PVM in  
360 GRA14-deficient parasites (23) and the enlarged vesicular structures at the cyst membrane seen  
361 in GRA64-deficient parasites. Thus, we speculate that GRA64 is a membrane bound GRA  
362 protein that helps orchestrate host ESCRT recruitment indirectly under bradyzoite growth  
363 conditions. Co-IP and TurboID experiments confirm interactions between GRA64 and any one  
364 of the ESCRT proteins we identified as enriched by these methods however, the limitations of  
365 studying these interactions at the host PVM or cyst membrane is due to the lack of functional  
366 assays for these interactions.

367 GRA64 (TGME49\_202620) is 330 amino acids in length, possess a signal peptide (1-19),  
368 and a transmembrane domain proximal to the C-terminus (268-291) (33). In the hyperLOPIT  
369 subcellular proteomics study, GRA64 was suggested to localize to the dense granule organelles  
370 (38), a prediction that we confirmed by co-localization with GRA1 (Fig. 1). GRA64 is expressed  
371 at all parasite stages but exhibits high expression in tachyzoites and peak expression in  
372 bradyzoites (39). It is notable that GRA64 is conserved in *Hammondia*, *Neospora* (two adjacent  
373 genes are present), and *Besnoitia*, which are all cyst-forming coccidians and yet have distinct  
374 definitive hosts. Our data reveal that GRA64 acts as an integral membrane-bound protein that is  
375 expressed at the PVM, IVN (Fig. 1), and the cyst wall (Fig. 2, Fig. 5A). GRA64 is predicted to  
376 be intrinsically disordered between the signal peptide and transmembrane domain (Fig. 1B).  
377 Disordered regions are dynamic modules that favor protein-protein interactions, and therefore  
378 GRA64 could have multiple roles at the PVM and cyst membrane. GRA64 has verified

379 phosphorylation sites at residues S59, S80, T81, S216 and S218 and a predicted N-glycosylation  
380 site at amino acid 55. It is possible that GRA64 activities are further regulated by protein  
381 phosphorylation, N-glycosylation and/or another post-translational modification.

382         The ESCRT machinery is comprised of ESCRT-0, ESCRT-I, ESCRT-II, ESCRT-III, the  
383 Vps4 complex, and associated accessory proteins (40), which sequentially interact to drive a  
384 wide variety of cellular processes such as membrane repair (41), membrane scission (42),  
385 phagophore closure (43), cytokinesis (44), membrane budding (45), and vesicle formation in  
386 multivesicular bodies (46). *Toxoplasma gondii* resides within a non-fusogenic parasitophorous  
387 vacuole derived from the host plasma membrane (47) and this modified membrane, the PVM, is  
388 an active site for vesicular trafficking (48, 49). Since the ESCRT machinery is involved in  
389 dynamic membrane processes such as membrane remodeling and scission (50), the ESCRT  
390 complex is likely to be involved in cellular processes at the PVM, e.g., PVM repair or host  
391 organelle sequestration into the vacuole at the PVM. Recently, ESCRT accessory host proteins  
392 (PDCD6IP/Alix, PDCD6, and CC2D1A- a regulator of ESCRT-III CHMP4B) were identified in  
393 proximity to the PVM using a targeted PVM domain fused to miniTurbo, a variant of biotin  
394 proximity-labeling (51). This finding, and those of GRA14 (23) leave numerous unanswered  
395 and exciting questions about the mechanics of ESCRT molecules at the PVM and cyst  
396 membrane, and their functional role in the biology of *T. gondii*.

397         Uptake of host-derived cytosolic proteins occur at the PVM and is partially dependent on  
398 the IVN (13), which is a membranous network of tubules that are conduits for moving material  
399 such as lipids between the host cell and parasites (52). A recent study demonstrated that several  
400 components of host ESCRT-I, ESCRT-III, and ESCRT accessory proteins immunoprecipitated  
401 with the vacuole membrane localized GRA14 protein tachyzoite and bradyzoite infected cells

402 (23). Furthermore, a direct connection was discovered between ESCRT and GRA14 at the PVM  
403 in the mediation of VLP-budding and in the ingestion of host cytosolic proteins (23). This  
404 discovery demonstrates that, in tachyzoites, host ESCRT proteins interact with a parasite effector  
405 protein, GRA14 to regulate membrane vesicular budding and the acquisition of host cytosolic  
406 cargo. Our findings of GRA64 interactions with host ESCRT-I, ESCRT-III, and accessory  
407 ESCRT proteins demonstrate that GRA14 is not the only PVM bound effector that interacts with  
408 host ESCRT in the tachyzoite-stage (Fig. 3A). Ongoing and future studies of GRA14 and  
409 GRA64 disruption will be essential to determine redundant and/or synergistic roles with host  
410 ESCRT in various aspects of nutrient uptake (e.g., recruitment, tethering/binding, ingestion)  
411 (53). Furthermore, GRA64 interacts with ESCRT-I, ESCRT-III and ESCRT accessory proteins  
412 in the bradyzoite stage in human foreskin fibroblasts (Fig. 3B) and in mouse primary cortical  
413 neurons (Fig. 3C). Collectively, these observations demonstrate an emerging paradigm in which  
414 parasite proteins interact with host ESCRT at the PVM in tachyzoites and at the cyst membrane  
415 in bradyzoites. It is probable that there are other parasite effectors that have yet to be  
416 characterized and/or discovered which can also interact with the host ESCRT machinery.

417         The physical nature of GRA64-ESCRT protein interactions is not yet fully known. We  
418 have eliminated a functional GRA64-ESCRT interaction for the VLP budding assay and a  
419 dispensable role for GRA64 in the acquisition of host proteins from the cytosol during tachyzoite  
420 growth conditions (Fig. 6). These results were not entirely surprising as GRA14, unlike GRA64,  
421 possesses motifs that resemble late domain motifs, which recruit ESCRT for HIV budding (54-  
422 56). Given the absence of described ESCRT binding motifs in the GRA64 amino acid sequence,  
423 it is plausible that recruitment of ESCRT occurs by ubiquitination (57). ESCRT-I can recognize  
424 ubiquitinated proteins that are targeted for degradation in multivesicular bodies (58).

425 Interestingly TurboID-GRA64 tachyzoites identified a possible GRA64 interaction with the  
426 ubiquitin ligase ITCH (Fig. 3D), which is phosphorylated to promote ubiquitination and  
427 subsequent degradation of a substrate (59). ITCH can influence lipid metabolism (60),  
428 endocytosis (61), viral budding and release (62, 63). Using a Bayesian Discriminant method to  
429 predict ubiquitination positions (64), we observed quite a few predicted ubiquitinated lysine  
430 residues in GRA64, with the highest ubiquitination score at K227. This theoretical ubiquitin site  
431 faces the host cytosol and therefore is a plausible candidate for ESCRT recruitment. Further  
432 studies are required to identify the ubiquitin status of GRA64 and whether this modification is  
433 required for ESCRT interactions.

434 *In vivo* cyst defects due to gene knockouts can be hard to characterize as knockouts can  
435 result in reduced cyst burdens (65, 66) and increased cyst fragility (67) making cyst purification  
436 problematic. However, deletion of GRA64 did not significantly reduce cyst burdens (Fig. S3)  
437 and therefore, cysts could be further evaluated for ultrastructural changes (Fig. 5). In the  $\Delta gra64$   
438 cysts, there was an intact cyst wall, a normal IVN, and healthy bradyzoites packed with  
439 amylopectin. The knockout of GRA64 did, however, result in the presence of large vesicular  
440 structures adjacent to the cyst wall, which we interpret as “stalled-scission events”, in which the  
441 inefficient or absent recruitment of ESCRT proteins results in the failure of intraluminal vesicle  
442 scission into the mature tissue cysts. The directionality of these large vesicular structures (i.e.,  
443 whether they are derived from or being targeted to the cyst membrane) and the possible  
444 consequences of stalled-scission events are unknown and demand further investigation.

445 It is not surprising that host ESCRT molecules are intimately involved in the *T. gondii*  
446 life stages as the parasite recruits organelles and acquires nutrients from the host such as  
447 lysosomes (18), lipids (68) and cholesterol (69). The recent discovery of ESCRT interactions at

448 the PVM and cyst membrane by independent labs corroborate the connection and highlights the  
449 complexity of this process. Our findings hint at a possible role for host ESCRT recruitment at  
450 mature *in vivo* cyst membranes. This is only the beginning with respect to understanding the  
451 relevance of ESCRT recruitment at tachyzoite and bradyzoite vacuolar membranes.

452

453

## 454 **MATERIALS AND METHODS**

### 455 **Cell culture**

456 All parasite strains were continuously passaged in human foreskin fibroblasts (HFF:ATCC:CRL-  
457 1634; Hs27) in a 37°C, 5% CO<sub>2</sub> incubator using Dulbecco's Modified Eagle Media (DMEM,  
458 Gibco) supplemented with 10% fetal calf serum, 1% L-glutamine, and 1% penicillin and  
459 streptomycin. Cultures were regularly inspected and tested negative for mycoplasma  
460 contamination. Bradyzoite induction was performed at the time of invasion by replacing growth  
461 media with bradyzoite induction media (50 mM HEPES, pH 8.2, DMEM supplemented with 1%  
462 FBS, penicillin and streptomycin) prior to infection of human foreskin fibroblasts with egressed  
463 tachyzoites. Bradyzoite induced cultures were maintained in a 37°C incubator without CO<sub>2</sub>, with  
464 induction media replaced every 2 days for all experiments.

465 Mouse primary cortical neurons were harvested from E14 mouse embryos obtained from  
466 pregnant C57Bl/6 mice, ordered from Charles River or Jackson Labs. Dissections of E14 cortical  
467 neurons were performed as previously described (70). Following dissection,  $1 \times 10^6$  -  $1 \times 10^7$   
468 cortical neurons were plated onto poly-L-lysine coated 15cm diameter culture dishes and later

469 cultured in Neurobasal Media (Thermo Fisher) supplemented with GlutaMAX Supplement  
470 (Thermo Fisher) and B-27 Supplement (Gibco). After 4 days *in vitro* (DIV), cytarabine (ara-C)  
471 was added to each culture at a final concentration of 0.2 $\mu$ M to minimize contamination from  
472 dividing, non-neuronal cells. Cultures were maintained for up to 16 days by replacing half of the  
473 conditioned media with fresh supplemented Neurobasal media every 7 days.

474

### 475 **Cloning and Parasite Transfections**

476 For a full list of primers used for cloning and genetic manipulations, refer to Supplementary  
477 Table 1. Briefly, for all Cas9 mediated genetic manipulations, single guide RNAs (sgRNA)  
478 targeting the C- or N-terminus of various genes were cloned into the p-HXGPRT-Cas9-GFP  
479 plasmid backbone using KLD reactions (New England Biolabs), as previously described (71).  
480 100bp donor oligonucleotides were designed and synthesized (Thermo Fisher) with homologous  
481 arms targeting the region of interest and encoding either an epitope tag, stop codons (for  
482 knockout transfections), or start codons (for complement transfections) in-frame to the region of  
483 interest. Donor sequences for homology mediated recombination with TurboID were generated  
484 by PCR using 3xHA-TurboID-NLS\_pCDNA3 (kind gift from Alice Ting, Addgene plasmid #  
485 107171) as plasmid template with primers containing overhangs with 40bp homology to the  
486 GRA64 region of interest. For epitope tagging GRA64 without Cas9 (ectopic expression), the  
487 GRA64 genomic locus was amplified from Pru $\Delta ku80\Delta hxgp rt$  genomic DNA with primers to the  
488 C-terminus of GRA64 and 1.5kb upstream of the start codon (the putative promoter region), with  
489 overhangs to pLIC-3xHA-DHFR sequences (72). Gibson Assemblies (NEBuilder HiFi DNA

490 Assembly) were subsequently performed to clone PCR amplicons encoding a parasite gene of  
491 interest into PCR amplified pLIC-3xHA-DHFR plasmid backbones.

492 For all transfections,  $5 \times 10^6$  -  $1 \times 10^7$  Pru $\Delta ku80\Delta hxgprrt$  or RH $\Delta ku80\Delta hxgprrt$  tachyzoites  
493 were electroporated in cytomix (73) after harvesting egressed parasites from human foreskin  
494 fibroblast monolayers and filtering through 5 $\mu$ m filters. Selection of transfected parasites was  
495 performed with media containing 25 $\mu$ g/mL mycophenolic acid and 50 $\mu$ g/mL xanthine 24 hours  
496 post-transfection for 6 days before removing selection media and subcloning by limiting dilution,  
497 after sufficient parasite egress was observed. For Cas9 transfections, 7.5 $\mu$ g of uncut Cas9  
498 plasmid and 1.5 $\mu$ g of PCR amplified donor sequence or 280 pmol un-annealed 100bp donor  
499 oligos were used per transfection. For ectopic transfections, 10 $\mu$ g of circular plasmid was used  
500 for random integration into the genome.

501

## 502 **Immunofluorescence Assays**

503 Human foreskin fibroblast monolayers were grown to confluency on glass coverslips and  
504 infected with egressed tachyzoites at an MOI of 1 for most immunofluorescence assays, allowing  
505 growth to proceed under tachyzoite or bradyzoite growth conditions (using the media  
506 formulation described above). All coverslips were fixed with 4% PFA for 20min at room  
507 temperature, permeabilized in a 0.2% Triton X-100, 0.1% glycine solution for 20min at room  
508 temperature, rinsed with PBS, and blocked in 1% BSA for either 1 hour at room temperature or  
509 at 4°C overnight. For selective permeabilization experiments, coverslips were fixed with 4%  
510 PFA for 20min, allowed to cool in PBS at 4°C for 15min, incubated in 0.001% digitonin in PBS  
511 for 5min at 4°C, detergent rinsed with PBS, and blocked in 1% BSA for 1 hr at room

512 temperature or overnight. After blocking, coverslips were labeled with antibodies as follows:  
513 HA-tagged proteins were detected with rat anti-HA 3F10 (Sigma 1:200-1:500), parasitophorous  
514 vacuole with in-house mouse anti-MAG1 (1:500), dense granules with mouse anti-GRA1  
515 (1:1000), and biotin with anti-biotin (Abcam, ab53494, 1:1000). Appropriate secondary  
516 antibodies conjugated to Alexa Fluorophores 488, 555, 594, and 633 targeting a given primary  
517 antibody species, or streptavidin conjugated to Alexa Fluorophore 488, were used at a dilution of  
518 1:1000 (Thermo Fisher). DAPI counterstain was used to label parasite and host cell nuclei  
519 (1:2000). Coverslips were mounted in ProLong Gold Anti-Fade Reagent (Thermo) and imaged  
520 using either a Leica SP8 confocal microscope or a Nikon Eclipse widefield fluorescent  
521 microscope (Diaphot-300).

522

### 523 **Membrane Fractionation**

524 Human fibroblast monolayers were infected, and parasites were cultured for 2 days under  
525 tachyzoite growth conditions. The infected cells were washed and scraped with ice-cold PBS  
526 (containing inhibitor cocktail with EDTA, 5 mM NaF, and 2 mM activated  $\text{Na}_3\text{VO}_4$ ). Infected  
527 cultures were lysed by passage through a 27-gauge needle and intact parasites were separated by  
528 low-speed centrifugation at 2,500xg for 10min at 4°C. The resulting low-speed pellet was  
529 discarded, while the low-speed supernatant (lysate) containing membranous components was  
530 separated into soluble and membrane-associated fractions by high-speed centrifugation at  
531 100,000xg for 1.5 hours. The resulting high-speed supernatant (HSS) containing soluble  
532 parasitophorous vacuole or cyst components was saved, while the resulting high-speed pellets  
533 (HSP) were treated by resuspension in various buffers to free peripheral or integral membrane-



534 associated proteins. Resuspended fractions were centrifuged again at 100,000xg for 1.5 hours to  
535 separate liberated proteins in the high-speed supernatant from remaining membrane-bound  
536 proteins in the high-speed pellet. All fractions were concentrated by acetone precipitation  
537 overnight prior to immunoblotting.

538

### 539 **Immunoblotting**

540 Protein lysates were prepared in radioimmunoprecipitation assay (RIPA) buffer from infected  
541 fibroblast cultures as specified for each experiment. Laemmli sample buffer was added to all  
542 samples and boiled for 5min before loading onto an SDS-PAGE 4-20% pre-cast gradient gel  
543 (TGX). Transfer to PVDF membranes (Millipore) was performed in Towbin buffer (20%  
544 methanol, Tris/Glycine) for 2 hours at 100V, and blocking in 5% BSA/TBST was performed  
545 overnight in 4°C. Membranes were labeled in 5% BSA/TBST with either Streptavidin-HRP  
546 (1:10,000, Thermo Fisher), anti-HA peroxidase conjugated antibodies (Sigma, 1:200) or rabbit  
547 TgALD1 antibody (1:200, kind gift from Dr. Kentaro Kato) and anti-rabbit HRP antibodies  
548 (Thermo Fisher, 1:10000) followed by development of signal with West Pico Plus  
549 Chemiluminescent Substrate (Thermo Fisher), or by using LiCor anti-rabbit 680 and LiCor anti-  
550 mouse 800 secondary antibodies. Antibodies against TSG101 (Invitrogen Clone 4A10, MA1-  
551 23296) and PDCD6 (Proteintech, 12303-1-AP) were also used. Images of labeled blots were  
552 collected with a Li-COR instrument (Odyssey Imaging System) or a Bio-Rad Chemidoc Imaging  
553 System.

554

### 555 **Immunolectron microscopy**

556 For immunoelectron microscopy of 3xHA-GRA64 PruQ tagged tachyzoites, samples were  
557 prepared from infected human fibroblast monolayers grown under tachyzoite growth conditions  
558 for 24 hours. Cultures were fixed in 4% paraformaldehyde and immunolabeled with anti-HA  
559 antibody conjugated to both Alexa fluor-488 and a 10nm gold particle using the protocol  
560 described above (under Immunofluorescence Assays). After imaging Alexa 488 labeled GRA64,  
561 cells were fixed with 2.5% glutaraldehyde and 2.0% paraformaldehyde in 0.1M sodium  
562 cacodylate buffer, rinsed with 0.1M sodium cacodylate buffer, postfixed with 1% osmium  
563 tetroxide, *en bloc* stained with 2% uranyl acetate, dehydrated in a graded series of ethanol, and  
564 infiltrated with LX112 epoxy resin (LADD Research Industries, Burlington VT). Samples were  
565 polymerized at 60°C for 60 hours and blocks were popped-off the coverslip. Regions of interest  
566 (ROI) were cut out and remounted on a flat BEEM capsule for sectioning. Trimming to the  
567 specific ROI was done using Trimtool 45° (Diatome) blocks then serial thin sectioned (70nm) *en*  
568 *face* on a Leica UC7 using a Diatome Ultra 35° knife. Sections were picked up on formvar  
569 coated slot grids, stained with uranyl acetate and lead citrate, and photographed using Kodak  
570 4489 film on a JEOL 1200EX TEM.

571 For electron microscopy of *in vivo* derived tissue cysts, cysts were harvested from  
572 homogenized infected mouse brains (4 weeks p.i.) using a Wheaton Potter-Elvehjem Tissue  
573 Grinder. Cysts were enriched with 45% Percoll and centrifugation at 26,600xg for 20min at 4°C.  
574 The cyst enriched fraction was harvested from the Percoll solution and diluted in PBS prior to a  
575 final spin at 130xg for 10min at 4°C. Pellets containing cysts were resuspended in either 2.5%  
576 glutaraldehyde and 2% paraformaldehyde in 0.1M sodium cacodylate buffer for morphological  
577 analysis or in 4% paraformaldehyde and 0.1% glutaraldehyde in 0.1M sodium cacodylate buffer  
578 for immunoelectron microscopy. Samples for morphological analysis were prepared as

579 described above prior to imaging with a JEOL 1400EX transmission electron microscope,  
580 whereas samples prepared for immunoelectron microscopy were dehydrated with a graded  
581 ethanol series, embedded in Lowicryl HM-20 monostep resin, and polymerized by UV light prior  
582 to labeling with anti-HA antibody (Roche, clone 3F10, 1:40 dilution) and 10nm gold bead  
583 conjugated goat anti-rat (Electron Microscopy Sciences, 1:100 dilution), or with goat anti-rat  
584 only as a negative control. Electron Microscopy images of *in vivo* derived tissue cysts were  
585 viewed on a JEOL 1400 Plus using Digital Micrograph software from Gatan.

586 For tomograms of *in vivo* derived tissue cysts, 250nm thick epoxy sections were picked  
587 up onto slot grids and post stained with uranyl acetate and lead citrate. Gold fiducial markers  
588 (10nm) were added to the sample prior to imaging to aid in downstream alignment. Tilt series  
589 (single axis) were collected on the JEOL 1400 Plus from -60 to +60 using Serial EM software  
590 (74). IMOD software was used for alignment and reconstruction of each tomogram as well as  
591 the tracing of structures (e.g., vesicles, cyst wall, and parasite membrane) observed in the  
592 tomogram to create a model (75).

593

## 594 **Plaque Assays**

595 Parasites were harvested from host cells with a 27G needle and filtered through a 5 $\mu$ m filter to  
596 remove host cell debris. Parasite numbers were quantified with a hemocytometer, and 100  
597 parasites from each strain were added in triplicate to wells containing confluent human foreskin  
598 fibroblasts in 6-well dishes. Parasites were grown for 14 days before fixing and staining with a  
599 20% methanol-0.5% crystal violet solution. Plaque size was quantified using ImageJ using  
600 blinded images and the line tool to separate neighboring plaques. Kruskal-Wallis tests with

601 Dunn's multiple comparisons were performed to test for significant differences in average plaque  
602 size with PRISM 8. Plaque assays were repeated three times with PruQ GRA64 parasite strains,  
603 using different batches of parasites and host cells for each independent experiment.

604

## 605 **Co-Immunoprecipitations**

606 For GRA64 Co-IPs from tachyzoite infected cultures, two independent experiments were  
607 performed in which 15cm diameter cell culture dishes containing confluent human foreskin  
608 fibroblast monolayers were infected at an MOI of 3 with either parasite expressing a 3xHA tag at  
609 the endogenous locus of GRA64 (N-terminus), using an equivalent amount of PruQ non-HA  
610 tagged parasites each replicate as a control in parallel. Dishes were washed with ice cold PBS 24  
611 hours post-infection and lifted off each dish with a cell scraper in 1mL ice cold lysis buffer  
612 (50mM Tris pH 7.4, 200mM NaCl, 1% Triton X-100, and 0.5% CHAPS) supplemented with  
613 cOmplete EDTA-free protease inhibitor (Sigma) and phosphatase inhibitors (5mM NaF, 2mM  
614 activated  $\text{Na}_3\text{VO}_4$ ). Scraped cultures were passed through a 27G needle five times and sonicated  
615 for 30 seconds total (20% amplitude, 1 second pulses). Sonicated samples were incubated on ice  
616 for 30min, supernatant cleared by centrifugation (1000xg, 10min), and incubated overnight in a  
617 4°C rotator with 0.25mg anti-HA magnetic beads (100uL slurry, Thermo Fisher). Following  
618 overnight incubation, beads were separated on a magnetic stand and washed twice in lysis buffer  
619 and four times in wash buffer (50mM Tris pH 7.4, 300mM NaCl, 0.1% Triton X-100) prior to  
620 elution in Laemmli buffer with 50mM DTT, boiling beads for 5min prior to magnetic separation  
621 and collection of eluates. Eluates were loaded, washed, and digested into peptides with 1µg of  
622 trypsin on S-TRAP micro columns (Protifi) per manufacturer guidelines. S-TRAP peptide

623 eluates were concentrated with a speed vac, desalted in HLB resin (Waters), and concentrated in  
624 a speed vac once more prior to LC-MS/MS acquisition.

625 For GRA64 Co-IPs from bradyzoite and neuron infection conditions, two separate  
626 experiments were performed identically to that described above for tachyzoite Co-IPs, except  
627 that bradyzoite infections in human fibroblast monolayers were performed with an MOI of 1 in  
628 bradyzoite differentiation media, and cultures were maintained for 4 days of infection prior to  
629 protein harvesting. For neuron infections, an MOI of 3 and infection period of two days was  
630 used prior to protein harvesting, infecting neurons after 14 DIV.

631 For the reciprocal Co-IP using CHMP4B antibody (Thermo Fisher, rabbit polyclonal, cat  
632 no. PA5-64271), 7.5 $\mu$ g of antibody was conjugated to Dynabeads per manufacturer guidelines.  
633 Two 15cm dishes were infected with 3xHA-GRA64 tagged PruQ parasites at an MOI of 3, with  
634 infection proceeding under tachyzoite growth conditions for 24 hours. Protein was harvested and  
635 Co-IPs performed as described above with either CHMP4B-conjugated Dynabeads or  
636 unconjugated Dynabeads (with an equivalent weight to that used for CHMP4B antibody  
637 conjugation). Eluates were collected and analyzed by immunoblotting, as described above.

638

### 639 **Proximity-Based Biotinylation Protein Preparation**

640 For GRA64-TurboID proximity-based biotinylation experiments, untagged PruQ parasites or  
641 parasites expressing TurboID-tagged GRA64 were used to infect confluent human fibroblast  
642 monolayers in two 15cm dishes at an MOI of 1 under bradyzoite growth conditions (as described  
643 above) for 3 days. Exogenous biotin was supplemented to the media at a final concentration of  
644 150 $\mu$ M. Following infection with biotin supplementation, dishes were rinsed, scraped, and

645 pelleted in PBS (500xg, 10min), after which pellets were solubilized in RIPA buffer  
646 supplemented with protease inhibitor cocktail (Roche cOmplete tablets). After 30min of RIPA  
647 buffer incubation on ice, insoluble material was cleared from supernatant by centrifugation  
648 (16,1000xg for 15min), and supernatant was incubated with streptavidin agarose resin (Thermo  
649 Fisher) overnight at 4C° on a rotator. Following incubation, streptavidin resin and bound  
650 biotinylated proteins were washed in RIPA urea buffer (50mM Tris-HCl pH 7.5, 8M urea,  
651 150mM NaCl) and subsequently reduced and alkylated with TCEP-HCl and iodoacetamide  
652 respectively. On-bead digestion was performed with trypsin and Lys-C proteases, and peptides  
653 were harvested from streptavidin resin. Peptides were desalted using C18 tips (Thermo Fisher)  
654 prior to liquid chromatography-tandem mass spectrometry acquisition.

655

## 656 **LC-MS/MS Acquisition and Analysis**

657 For peptide samples from all Co-IP and GRA64-TurboID experiments, samples were  
658 resuspended in 10 µl of water + 0.1% TFA and loaded onto a Dionex RSLC Ultimate 300  
659 (Thermo Scientific, San Jose, CA, USA), coupled online with an Orbitrap Fusion Lumos  
660 (Thermo Scientific). The mass spectrometer was set to acquire spectra in a data-dependent  
661 acquisition (DDA) mode. Briefly, the full MS scan was set to 300-1200  $m/z$  in the orbitrap with  
662 a resolution of 120,000 (at 200  $m/z$ ) and an AGC target of  $5 \times 10^5$ . MS/MS was performed in the  
663 ion trap using the top speed mode (2 secs), an AGC target of  $10^4$  and an HCD collision energy  
664 of 30. Raw files were searched using Proteome Discoverer software (v2.4, Thermo Scientific)  
665 using SEQUEST as search engine. We used the SwissProt human or mouse databases (updated  
666 January 2020) and the *Toxoplasma* database (Release 44, ME49 proteome obtained from

667 ToxoDB). The search for total proteome included variable modifications of methionine  
668 oxidation and N-terminal acetylation, and fixed modification of carbamidomethyl cysteine.  
669 Trypsin was specified as the digestive enzyme. Mass tolerance was set to 10 pm for precursor  
670 ions and 0.2 Da for product ions. Peptide and protein false discovery rates were set to 1%.

671 For quantitative analysis, peptide intensity values were log<sub>2</sub> transformed, normalized by  
672 the average value of each sample and missing values were imputed using a normal distribution 2  
673 standard deviations lower than the mean. Individual peptide fold changes (Tag vs. Control) for a  
674 given protein were calculated and averaged to obtain protein fold enrichment. P-values were  
675 then obtained from t-distributions and t-values calculated for each protein with at least two  
676 detected peptides by treating protein fold enrichment as the sample mean and using log  
677 transformed peptide intensity values to calculate the standard deviation, sample size, and degrees  
678 of freedom. Data distribution was assumed to be normal, but this was not formally tested. Fold-  
679 change and p-value significance cutoffs for both Co-IP and TurboID experiments were arbitrarily  
680 selected.

681 LC-MS/MS data from both Co-IP and TurboID experiments have been deposited onto the  
682 public repository Chorus under Project ID 1735.

683

## 684 **Mouse Experiments**

685 Eight-week-old female C57Bl/6 mice (The Jackson Laboratory, Bar Harbor, ME) were infected  
686 intraperitoneally with 2000 tachyzoites of a given strain for all acute virulence/survival curve  
687 experiments. Mortality was observed daily over 30 days. For cyst burden analysis, brains were  
688 collected from C57Bl/6 mice 28-30 days post infection or CBA/J mice (The Jackson Laboratory,

689 Bar Harbor, ME) 28-30 days post-infection. One brain hemisphere or a whole brain from an  
690 infected mouse was homogenized with a Wheaton Potter-Elvehjem Tissue Grinder with a 100-  
691 150  $\mu\text{m}$  clearance (ThermoFisher) in PBS and an aliquot of the homogenate was viewed under a  
692 epifluorescence microscope (Nikon) to count GFP-positive cysts. Kruskal-Wallis tests and  
693 Dunn's multiple comparisons test were performed to test for significance between groups with  
694 non-normal distribution with PRISM 8. For groups with normal data distribution, a one-way  
695 ANOVA was used to determine statistical significance. A log-rank test was performed to test for  
696 statistical significance in Kaplan-Meier survival curves in PRISM 8.

697

#### 698 **HIV-1 virus-like particle assay**

699 To generate GagGRA64\_Venus, pGag\_Venus was linearized using SmaI and SmaI. A fragment  
700 encoding the region upstream of the p6 domain from the 664-base pair (bp) to 1456 bp  
701 (GagInsert) was generated. Two fragments encoding the GRA64 N-terminus were designed to  
702 test the efficiency of GRA64 in substituting the HIV-1 Gag p6 domain. The first fragment  
703 encompassed the whole GRA64 N-terminus (GRA64.1) and the second fragment was amplified  
704 from 75 bp upstream of the first putative late domain motif encoded in GRA64 and 45 bp  
705 downstream of the last putative late domain motif (GRA64.2), the same strategy used to generate  
706 the GagGRA14 (23). Fragments were introduced into the linearized Gag\_Venus plasmid vector  
707 using Gibson Assembly. All plasmids were confirmed by Sanger sequencing.

708 HIV-1 Gag virus-like particles (VLPs) were collected by ultracentrifugation and analyzed  
709 by immunoblot as previously described (23, 76). Lipofectamine 2000 was used to transfect  
710 HeLa cells with pRev, pVphu and pGag\_Venus constructs. At 18 hours post transfection, the  
711 supernatants containing the released VLPs were collected. The samples were filtered and



712 ultracentrifuged at 35,000 rpms for 45min at 4°C to collect the VLP pellets that were further  
713 lysed with 0.5% Triton X-lysis buffer. The cell lysates were prepared by lysing the transfected  
714 monolayer with the same lysis buffer. The lysates (obtained by loading 100% VLP fraction and  
715 6% cellular fraction on SDS-PAGE gel) were analyzed by immunoblot by probing with human  
716 anti-Gag. Band intensity was quantified using Image J. Total Gag corresponds to the sum of  
717 cell- and VLP-associated Gag. The VLP release efficiency corresponds to the fraction of Gag  
718 that was released as VLP relative to the total Gag. The percentage of VLP release is set to 100%  
719 and normalized relative to Gag, which had a % release efficiency of  $5.57 \pm 3.6$ .

720

#### 721 **Parasite ingestion assay**

722 Inducible mCherry HeLa cells previously described (23) were seeded in a 6-well plate and  
723 induced for 4 days for cytosolic mCherry expression by adding 2 µg/mL doxycycline. The cells  
724 were then infected with  $1 \times 10^6$  parasites and treated with 5 µM LHVS at four hours post-infection  
725 to inhibit the degradation of the ingested material. Parasites were harvested at 24 hours post-  
726 infection as previously described (13).

727

#### 728 **Ethics Statement**

729 All mouse experiments were conducted according to guidelines from the United States Public  
730 Health Service Policy on Humane Care and Use of Laboratory Animals. Animals were  
731 maintained in an AAALAC-approved facility, and all protocols were approved by the  
732 Institutional Care Committee of the Albert Einstein College of Medicine, Bronx, NY (Animal  
733 Protocol 00001451; Animal Welfare Assurance no. A3312-01).

734

735 **ACKNOWLEDGEMENTS**

736 We thank members and collaborators of the Weiss lab for their comments, suggestions, and  
737 insights on this work. We thank John Boothroyd and Alicja Cygan for useful insights and  
738 suggestions on this work. A special thanks goes to the Albert Einstein Analytical Imaging  
739 Facility, specifically Xheni Nishku and Timothy Mendez for electron microscopy sample  
740 preparation and training, as well as Frank Macaluso for suggestions on electron tomography. We  
741 thank the Einstein Laboratory for Macromolecular Analysis and Proteomics for all their  
742 assistance with LC-MS/MS preparations and analysis.

743 This work was supported by P30CA013330, SIG #1S10OD016214-01A1 and  
744 SIG#1S10OD023591-01 (Einstein Analytical Imaging Facility), F31AI136401 (J.M.),  
745 T32AI070117 (R.B.G), F31AI152297 (Y.R.C), R01AI120607 (V.B.C), R01AI134753 (L.M.W.).

746

747 **Author contributions:** J.M., R.B.G., and L.M.W. conceived and designed the work, with  
748 contributions from Y.R.C., J.R., S.S., V.B.C., and I.C.; J.M. and R.B.G. performed the majority  
749 of the experiments, with contributions from V.T. on mouse experiments; T.T. generated the  
750 ME49 $\Delta ku80\Delta hxgprt$  (ME49Q) strain; Y.R.C. performed viral-like particle and parasite ingestion  
751 assays; S.S. assisted with proteomic sample preparation and LC-MS/MS analyses; L.G.C.  
752 assisted with electron microscopy sample preparations; J.R. and I.C. assisted with electron  
753 microscopy and tomogram analyses; J.M., R.B.G. and L.M.W. wrote the paper, with  
754 contributions from Y.R.C., S.S. and L.G.C.

755

756

757 **FIGURE LEGENDS**

758

759 **Figure 1. GRA64 is a dense granule integral membrane protein localizing to the**  
760 **intravacuolar network during tachyzoite infection.**

761 **(A)** Amino acid sequence of TGME49\_202620. The predicted signal peptide is indicated by a  
762 box (SignalP 5.0 prediction), while the predicted transmembrane domains are indicated by  
763 underlines (black – TMHMM prediction, red – Phobius prediction).

764 **(B)** Results from IUPred3 short disorder prediction of TGME49\_202620 protein intrinsic  
765 disorder is displayed using medium smoothing. The score indicates regions of low and high  
766 disorder.

767 **(C)** Top panel - IFA image of C-terminus 3xHA epitope tagged TGME49\_202620 protein from  
768 tachyzoite vacuoles 1-day post-infection. TGME49\_202620 is detected within the  
769 parasitophorous vacuole, seemingly outlining the PVM. Bars, 10µm. Bottom panel – IFA image  
770 of extracellular parasites expressing N-terminus 3xHA epitope tagged TGME49\_202620 protein.  
771 TGME49\_202620 (hereafter referred to as GRA64) colocalizes with GRA1. Bars, 5µm.

772 **(D)** Immunoelectron microscopy of a tachyzoite vacuole expressing 3xHA epitope tagged  
773 GRA64 protein. Signal from 10nm gold particles conjugated to anti-HA antibody appear to  
774 associate with membranous structures of the IVN within the parasitophorous vacuole. Bars,  
775 500nm.

776 **(E)** Immunoblot of GRA64 protein detected in various fractions following ultracentrifugation of  
777 protein lysates from tachyzoite infected fibroblast monolayers. HSS or S – high speed

778 supernatant; P – high speed pellet (membrane fraction). Treatment of high-speed pellets with  
779 6M Urea, 1M NaCl, 0.1M Na<sub>2</sub>CO<sub>3</sub> (pH 11), 0.1% NP-40, and 0.1% Triton X-100 (TX-100).

780

781 **Figure 2. Epitope tagged- and TurboID tagged- GRA64 proteins are exposed to the host**  
782 **cell cytoplasm during intracellular infection.**

783 **(A)** IFA panels of parasites expressing GRA64 tagged at the N-terminus with a 1xHA tag in  
784 tachyzoite vacuoles (2 days p.i., pH7) or induced bradyzoite vacuoles (3 days p.i., pH8). The  
785 digitonin concentration used for permeabilization in these experiments (0.001%) selectively  
786 permeabilizes the host cell membrane, but not the PVM. In contrast, Triton X-100 fully  
787 permeabilizes the host cell and the PVM, as demonstrated by positive staining of MAG1, a  
788 parasite protein localizing to the lumen of parasitophorous vacuoles and to the cyst wall in  
789 differentiating parasite vacuoles. Bars, 5µm.

790 **(B)** IFA panels of parasites expressing GRA64 tagged at the N-terminus with a 3xHA and the  
791 proximity-based biotinylating enzyme TurboID tag or untagged PruQ parasites in induced  
792 bradyzoite vacuoles (7 days p.i., pH8). Infected cells were permeabilized with digitonin  
793 (0.001%) to selectively permeabilizes the host cell membrane, but not the PVM. Vacuoles were  
794 stained with αbiotin and αHA to confirm activity of the TurboID tag and expression of GRA64  
795 via the 3xHA tag at the host cytoplasm interface, respectively. The lack of MAG1 labeling was  
796 used as an indicator for selective permeabilization. Bars, 5µm.

797

798 **Figure 3. GRA64 interacts with host ESCRT proteins.**

799 Volcano plots of LC-MS/MS results from co-immunoprecipitations of endogenously tagged  
800 3xHA-GRA64 protein from either infected human fibroblast monolayers under (A) tachyzoite or  
801 (B) bradyzoite growth conditions (1- and 4-days post-infection, respectively), or from (C) mouse  
802 primary cortical neuron cultures (2-days post-infection). In each volcano plot, red and blue data  
803 points indicate a host or parasite protein classified as significant in two independent experiments  
804 respectively ( $\log_2$  fold-enrichment  $\geq 2$  and p-value of  $< 0.1$  in both replicate 1 and replicate 2).  
805 Under each condition, the host proteins that were identified as significant hits were largely  
806 ESCRT or ESCRT-associated proteins.

807 (D) TurboID-GRA64 expressing parasites were used to identify proximal proteins in human  
808 foreskin fibroblast cultures. A list of all host cell proteins (red dots in the volcano plot) with  $\log_2$   
809 fold-enrichment  $\geq 2$  and a p-value of  $\leq 0.1$  are listed in the table. Significantly enriched parasite  
810 protein hits (blue dots) are provided in Supplementary Dataset 2.

811

812 **Figure 4. Immunoblot confirmation of ESCRT protein enrichment by GRA64.**

813 (A) Immunoblots of samples from an anti-HA Co-IP using either 3xHA-GRA64 tagged or  
814 untagged PruQ parasites as a control. Protein lysates were harvested for Co-IP from either  
815 human foreskin fibroblast infected monolayers (left panel) or from neuron infected cultures  
816 (right panel). Although no robust enrichment of GRA64 is seen in the eluate fraction compared  
817 to the input fraction (top left panel), both TSG101 and PDCD6 were only detected in the 3xHA-  
818 GRA64 eluate samples and not the control samples (bottom left panel), indicating ESCRT  
819 protein enrichment in agreement with LC-MS/MS results. Similarly, PDCD6 was only detected

820 the 3xHA-GRA64 eluate and not the control eluate from neuron infection samples (bottom right  
821 panel).

822 **(B)** Immunoblot of 3xHA-GRA64 protein immunoprecipitated with dynabeads conjugated with  
823 anti-CHMP4B antibody (and unconjugated beads, as a control). There is a notable enrichment of  
824 GRA64 using CHMP4B conjugated beads compared to unconjugated beads.

825

826 **Figure 5. *Δgra64* derived tissue cysts exhibit a change in ultrastructure.**

827 **(A)** Immunogold labeling (using rat anti-HA and anti-rat 10nm gold particle conjugated  
828 antibodies) of GRA64-COMP strain tissue cysts demonstrates GRA64-positive signal (red  
829 asterisks) seemingly within dense granule structures in bradyzoites and within the cyst wall. A  
830 GRA64-COMP tissue cyst labeled with only anti-rat gold conjugated antibody is provided in the  
831 panel below for comparison (“negative”). Bars = 2um and 500nm for magnified inserts.

832 **(B)** Magnified views of tissue cyst walls and cyst membranes formed by each strain as indicated.  
833 Note the presence of large vesicular structures within the cyst and proximal to the cyst wall in  
834 the *Δgra64* panel (white arrowheads). Bars = 0.5um.

835

836 **Figure 6. GRA64 does not mediate ESCRT-dependent HIV-1 virus like particle release**  
837 **and is not involved in internalization of host cytosolic proteins.**

838 **(A)** Comparison of percent HIV-1 VLP release efficiency between HIV-1 Gag, Gag $\Delta p6$ ,  
839 GagGRA64 and GagGRA14 relative to Gag VLP. Data represents the mean from n = 4-5

840 biological replicates. Statistical analysis was determined by a one-way ANOVA test followed by  
841 Tukey's multiple comparison test; \*\*,  $P < 0.01$ ; \*\*\*,  $P < 0.001$ ; \*\*\*\*,  $P < 0.0001$ .

842 **(B) Quantification of the uptake of host cytosolic proteins in replicating parasites.** Analysis of  
843 ingestion by PRUQ, PRUQ $\Delta$ *gra64* and PRUQ $\Delta$ *gra64*::GRA64 parasites treated with DMSO or  
844 LHVS. At least 200 parasites were analysis per sample. Data represents the mean from  $n = 3$   
845 biological replicates. Statistical analysis was determined by a one-way ANOVA test followed by  
846 Tukey's multiple comparison test; \*,  $P < 0.05$ ; \*\*,  $P < 0.01$ ; \*\*\*,  $P < 0.001$ .

847

848 **Movie 1. An electron tomogram of ME49Q tissue cyst.** Note the vesicles and tubules in the  
849 cyst wall. The dots seen are gold 10nm particles used for alignment during tomogram  
850 reconstruction.

851

852 **Movie 2. An electron tomogram of ME49Q $\Delta$ *gra64* tissue cyst.** Note the large vesicles  
853 adjacent to the cyst membrane and the lack of smaller vesicles and tubules in the cyst wall. The  
854 dots seen are gold 10nm particles used for alignment during tomogram reconstruction.

855

## 856 SUPPLEMENTAL FIGURES AND TABLES

857

### 858 Supplementary Table S1.

859 List of primers used in this study for CRISPR/Cas9 tagging and cloning of GRA64.

860

861 **Figure S1. TurboID-GRA64 LC-MS/MS results from infection of mouse primary cortical**  
862 **neuron cultures.**

863 TurboID-GRA64 expressing parasites were used to identify proximal proteins in infected mouse  
864 primary cortical neuron cultures in two independent experiments. A list of all parasite proteins  
865 (blue dots in the volcano plot) with  $\log_2$  fold-enrichment  $\geq 2$  and a p-value of  $\leq 0.1$  are listed in  
866 the table, while the ESCRT and ESCRT-associated proteins identified as significantly enriched  
867 in other datasets (see Fig. 3) are also listed for comparison.

868

869 **Figure S2. *Agra64* tachyzoites exhibit no growth defects *in vitro* or virulence defects *in vivo*.**

870 **(A)** Immunoblot demonstrating the absence of GRA64 protein expression in the PruQ knockout  
871 strain ( $\Delta gra64$ ) and comparable amounts of protein expressed in the PruQ parental (3xHA-  
872 GRA64) and complemented PruQ strain (GRA64-COMP). TgALD1 was used as a parasite  
873 specific loading control.

874 **(B)** Plaque assays in human fibroblasts monolayers cultures following 14 days of infection under  
875 tachyzoite growth conditions demonstrate no statistically significant difference in parasite  
876 growth, as measured by plaque sizes between each strain in three independent experiments.  
877 Representative images of plaques are provided for each strain beside the violin plots.

878 **(C)** C57Bl/6 mouse mortality was recorded over a span of 30 days post-intraperitoneal infection,  
879 using 2000 tachyzoites of each strain to infect 10 mice each. No significant differences in the  
880 survival curves were noted in this experiment (n.s.).



881

882 **Figure S3. Disruption of GRA64 does not significantly affect tissue cyst burdens.**

883 **(A-B)** Cyst burdens were measured from the brains of chronically infected CBA/J mice (30 days  
884 post-infection) using (A) PruQ strain or (B) ME49Q strain parasites. (A) *P*-values were  
885 calculated from a One-Way ANOVA test for significance in Replicate 1 and a Kruskal-Wallis  
886 test in Replicate 2 (as data were not normally distributed in Replicate 2). The data indicate a  
887 trend of fewer cysts formed during  $\Delta gra64$  infection compared to parental and complement  
888 strains in both experiments. No significant differences in cyst burden between parental and  
889 complement strains are present in either experiment. (B) *P*-values were calculated from a one-  
890 way ANOVA test for significance in both replicates. The data shows higher cyst numbers using  
891 a more cystogenic strain; however, no significant differences in cysts formed during  $\Delta gra64$   
892 infection was noted compared to wild-type, parental and complement strains in both  
893 experiments.

894

895 **Figure S4. Disruption of GRA64 *in vivo* brain cyst exhibits large vesicular structures that**  
896 **have close contact with the cyst membrane.**

897 Cysts were purified from the brains of chronically infected CBA/J mice (30 days post-infection)  
898 using the (A-B) ME49Q and (C-D) ME49Q $\Delta gra64$  parasites, prepared for EM serial imaging,  
899 and reconstructed. (A and C) The vesicles (shown in yellow, blue, green, and cyan), cyst wall  
900 (shown in magenta), and parasite membrane (shown in red) were traced using 3dmod within the  
901 IMOD software from the cyst shown in Movie 1 and 2. (B and D) A reconstruction model is  
902 shown comprised of each serial image traced for the ME49Q and ME49Q $\Delta gra64$  cysts.

903

904 **Supplementary Dataset 1. LC-MS/MS Data from Co-IP experiments.**

905 Data are present in eleven different tabs. The “Summary” tab for tachyzoite, bradyzoite, and  
906 neuron lists the calculated protein fold change (GRA64-3xHA/Control) and  $-\log_2$  p-values for all  
907 the proteins detected in each replicate. The “Replicate 1/2 Analysis” tab for tachyzoite,  
908 bradyzoite, and neuron demonstrates data transformation steps and equations used to determine  
909 average protein fold change and  $-\log_2$  p-values. The “Replicate 1/2 Raw Data” tab provides  
910 information on search engine identification quality parameters. This dataset has been deposited  
911 into the mass spectrometry open access repository Chorus under Project ID 1735.

912

913 **Supplementary Dataset 2. LC-MS/MS Data from TurboID experiments.**

914 Data are present in seven different tabs. The “Results Summary” tab for human foreskin  
915 fibroblast and neuron lists the calculated protein fold change (TurboID-GRA64/Control) and -  
916  $\log_2$  p-values for all the proteins detected in each replicate. The “Replicate 1/2 Analysis” tab for  
917 human foreskin fibroblast and neuron demonstrates data transformation steps and equations used  
918 to determine average protein fold change and  $-\log_2$  p-values. The “Raw Data” tab provides  
919 information on search engine identification quality parameters for replicate 1 and 2. This dataset  
920 has been deposited into the mass spectrometry open access repository Chorus under Project ID  
921 1735.

## 922 REFERENCES

- 923 1. Rostami A, Riahi SM, Gamble HR, Fakhri Y, Nourollahpour Shiadeh M, Danesh M, Behniafar  
924 H, Paktinat S, Foroutan M, Mokdad AH, Hotez PJ, Gasser RB. 2020. Global prevalence of latent  
925 toxoplasmosis in pregnant women: a systematic review and meta-analysis. *Clin Microbiol Infect*  
926 doi:10.1016/j.cmi.2020.01.008.
- 927 2. Frenkel JK, Dubey JP, Miller NL. 1970. *Toxoplasma gondii* in cats: fecal stages identified as  
928 coccidian oocysts. *Science* 167:893-6.
- 929 3. Hutchison WM, Dunachie JF, Siim JC, Work K. 1970. Coccidian-like nature of *Toxoplasma*  
930 *gondii*. *Br Med J* 1:142-4.
- 931 4. Dubey JP, Lindsay DS, Speer CA. 1998. Structures of *Toxoplasma gondii* tachyzoites,  
932 bradyzoites, and sporozoites and biology and development of tissue cysts. *Clin Microbiol Rev*  
933 11:267-99.
- 934 5. Di Cristina M, Marocco D, Galizi R, Proietti C, Spaccapelo R, Crisanti A. 2008. Temporal and  
935 spatial distribution of *Toxoplasma gondii* differentiation into Bradyzoites and tissue cyst  
936 formation in vivo. *Infect Immun* 76:3491-501.
- 937 6. Jeffers V, Tampaki Z, Kim K, Sullivan WJ, Jr. 2018. A latent ability to persist: differentiation in  
938 *Toxoplasma gondii*. *Cell Mol Life Sci* 75:2355-2373.
- 939 7. Waldman BS, Schwarz D, Wadsworth MH, 2nd, Saeij JP, Shalek AK, Lourido S. 2020.  
940 Identification of a Master Regulator of Differentiation in *Toxoplasma*. *Cell* 180:359-372.e16.
- 941 8. Holliman RE. 1988. Toxoplasmosis and the acquired immune deficiency syndrome. *J Infect*  
942 16:121-8.
- 943 9. Vollmer TL, Waldor MK, Steinman L, Conley FK. 1987. Depletion of T-4+ lymphocytes with  
944 monoclonal antibody reactivates toxoplasmosis in the central nervous system: a model of  
945 superinfection in AIDS. *J Immunol* 138:3737-41.
- 946 10. Coppens I, Romano JD. 2018. Hostile intruder: *Toxoplasma* holds host organelles captive. *PLoS*  
947 *Pathog* 14:e1006893.
- 948 11. Lemgruber L, Lupetti P, Martins-Duarte ES, De Souza W, Vommaro RC. 2011. The organization  
949 of the wall filaments and characterization of the matrix structures of *Toxoplasma gondii* cyst  
950 form. *Cell Microbiol* 13:1920-32.
- 951 12. Sibley LD, Niesman IR, Parmley SF, Cesbron-Delauw MF. 1995. Regulated secretion of multi-  
952 lamellar vesicles leads to formation of a tubulo-vesicular network in host-cell vacuoles occupied  
953 by *Toxoplasma gondii*. *J Cell Sci* 108 ( Pt 4):1669-77.
- 954 13. Dou Z, McGovern OL, Di Cristina M, Carruthers VB. 2014. *Toxoplasma gondii* ingests and  
955 digests host cytosolic proteins. *mBio* 5:e01188-14.
- 956 14. Romano JD, Nolan SJ, Porter C, Ehrenman K, Hartman EJ, Hsia RC, Coppens I. 2017. The  
957 parasite *Toxoplasma* sequesters diverse Rab host vesicles within an intravacuolar network. *J Cell*  
958 *Biol* 216:4235-4254.
- 959 15. Mercier C, Adjogble KD, Daubener W, Delauw MF. 2005. Dense granules: are they key  
960 organelles to help understand the parasitophorous vacuole of all apicomplexa parasites? *Int J*  
961 *Parasitol* 35:829-49.
- 962 16. Carruthers VB, Sibley LD. 1997. Sequential protein secretion from three distinct organelles of  
963 *Toxoplasma gondii* accompanies invasion of human fibroblasts. *Eur J Cell Biol* 73:114-23.
- 964 17. Mercier C, Dubremetz JF, Rauscher B, Lecordier L, Sibley LD, Cesbron-Delauw MF. 2002.  
965 Biogenesis of nanotubular network in *Toxoplasma* parasitophorous vacuole induced by parasite  
966 proteins. *Mol Biol Cell* 13:2397-409.
- 967 18. Coppens I, Dunn JD, Romano JD, Pypaert M, Zhang H, Boothroyd JC, Joiner KA. 2006.  
968 *Toxoplasma gondii* sequesters lysosomes from mammalian hosts in the vacuolar space. *Cell*  
969 125:261-74.
- 970 19. Deffieu MS, Alayi TD, Slomianny C, Tomavo S. 2019. The *Toxoplasma gondii* dense granule  
971 protein TgGRA3 interacts with host Golgi and dysregulates anterograde transport. *Biol Open* 8.

- 972 20. Pernas L, Adomako-Ankomah Y, Shastri AJ, Ewald SE, Treeck M, Boyle JP, Boothroyd JC.  
973 2014. Toxoplasma effector MAF1 mediates recruitment of host mitochondria and impacts the  
974 host response. *PLoS Biol* 12:e1001845.
- 975 21. Gold DA, Kaplan AD, Lis A, Bett GC, Rosowski EE, Cirelli KM, Bougdour A, Sidik SM, Beck  
976 JR, Lourido S, Egea PF, Bradley PJ, Hakimi MA, Rasmusson RL, Saeij JP. 2015. The  
977 Toxoplasma Dense Granule Proteins GRA17 and GRA23 Mediate the Movement of Small  
978 Molecules between the Host and the Parasitophorous Vacuole. *Cell Host Microbe* 17:642-52.
- 979 22. Paredes-Santos T, Wang Y, Waldman B, Lourido S, Saeij JP. 2019. The GRA17 Parasitophorous  
980 Vacuole Membrane Permeability Pore Contributes to Bradyzoite Viability. *Front Cell Infect  
981 Microbiol* 9:321.
- 982 23. Rivera-Cuevas Y, Mayoral J, Di Cristina M, Lawrence AE, Olafsson EB, Thornhill D, Waldman  
983 BS, Ono A, Sexton J, Lourido S, Weiss LM, Carruthers VB. 2021. Toxoplasma gondii subverts  
984 the host ESCRT machinery for parasite uptake of host cytosolic proteins.  
985 doi:<https://doi.org/10.1101/2021.07.21.453261>
- 986 24. Lecordier L, Mercier C, Sibley LD, Cesbron-Delauw MF. 1999. Transmembrane insertion of the  
987 Toxoplasma gondii GRA5 protein occurs after soluble secretion into the host cell. *Mol Biol Cell*  
988 10:1277-87.
- 989 25. Buaillon C, Guerrero NA, Cebrian I, Blanie S, Lopez J, Bassot E, Vasseur V, Santi-Rocca J,  
990 Blanchard N. 2017. MHC I presentation of Toxoplasma gondii immunodominant antigen does  
991 not require Sec22b and is regulated by antigen orientation at the vacuole membrane. *Eur J  
992 Immunol* 47:1160-1170.
- 993 26. Rome ME, Beck JR, Turetzky JM, Webster P, Bradley PJ. 2008. Intervacuolar transport and  
994 unique topology of GRA14, a novel dense granule protein in Toxoplasma gondii. *Infect Immun*  
995 76:4865-75.
- 996 27. Ma JS, Sasai M, Ohshima J, Lee Y, Bando H, Takeda K, Yamamoto M. 2014. Selective and  
997 strain-specific NFAT4 activation by the Toxoplasma gondii polymorphic dense granule protein  
998 GRA6. *J Exp Med* 211:2013-32.
- 999 28. Rosowski EE, Lu D, Julien L, Rodda L, Gaiser RA, Jensen KD, Saeij JP. 2011. Strain-specific  
1000 activation of the NF-kappaB pathway by GRA15, a novel Toxoplasma gondii dense granule  
1001 protein. *J Exp Med* 208:195-212.
- 1002 29. Ihara F, Fereig RM, Himori Y, Kameyama K, Umeda K, Tanaka S, Ikeda R, Yamamoto M,  
1003 Nishikawa Y. 2020. Toxoplasma gondii Dense Granule Proteins 7, 14, and 15 Are Involved in  
1004 Modification and Control of the Immune Response Mediated via NF-kappaB Pathway. *Front  
1005 Immunol* 11:1709.
- 1006 30. Hakimi MA, Olias P, Sibley LD. 2017. Toxoplasma Effectors Targeting Host Signaling and  
1007 Transcription. *Clin Microbiol Rev* 30:615-645.
- 1008 31. Rastogi S, Cygan AM, Boothroyd JC. 2019. Translocation of effector proteins into host cells by  
1009 Toxoplasma gondii. *Curr Opin Microbiol* 52:130-138.
- 1010 32. Erdos G, Pajkos M, Dosztanyi Z. 2021. IUPred3: prediction of protein disorder enhanced with  
1011 unambiguous experimental annotation and visualization of evolutionary conservation. *Nucleic  
1012 Acids Res* 49:W297-W303.
- 1013 33. Harb OS, Roos DS. 2020. ToxoDB: Functional Genomics Resource for Toxoplasma and Related  
1014 Organisms. *Methods Mol Biol* 2071:27-47.
- 1015 34. Branon TC, Bosch JA, Sanchez AD, Udeshi ND, Svinkina T, Carr SA, Feldman JL, Perrimon N,  
1016 Ting AY. 2018. Efficient proximity labeling in living cells and organisms with TurboID. *Nat  
1017 Biotechnol* 36:880-887.
- 1018 35. Tu V, Mayoral J, Yakubu RR, Tomita T, Sugi T, Han B, Williams T, Ma Y, Weiss LM. 2020.  
1019 MAG2, a Toxoplasma gondii Bradyzoite Stage-Specific Cyst Matrix Protein. *mSphere* 5.
- 1020 36. Ihara F, Nishikawa Y. 2021. Toxoplasma gondii manipulates host cell signaling pathways via its  
1021 secreted effector molecules. *Parasitol Int* 83:102368.

- 1022 37. Tomita T, Guevara RB, Shah LM, Afrifa AY, Weiss LM. 2021. Secreted Effectors Modulating  
1023 Immune Responses to *Toxoplasma gondii*. *Life (Basel)* 11.
- 1024 38. Barylyuk K, Koreny L, Ke H, Butterworth S, Crook OM, Lassadi I, Gupta V, Tromer E, Mourier  
1025 T, Stevens TJ, Breckels LM, Pain A, Lilley KS, Waller RF. 2020. A Comprehensive Subcellular  
1026 Atlas of the *Toxoplasma* Proteome via hyperLOPIT Provides Spatial Context for Protein  
1027 Functions. *Cell Host Microbe* 28:752-766 e9.
- 1028 39. Ramakrishnan C, Maier S, Walker RA, Rehrauer H, Joekel DE, Winiger RR, Basso WU, Grigg  
1029 ME, Hehl AB, Deplazes P, Smith NC. 2019. An experimental genetically attenuated live vaccine  
1030 to prevent transmission of *Toxoplasma gondii* by cats. *Sci Rep* 9:1474.
- 1031 40. Wollert T, Yang D, Ren X, Lee HH, Im YJ, Hurley JH. 2009. The ESCRT machinery at a glance.  
1032 *J Cell Sci* 122:2163-6.
- 1033 41. Jimenez AJ, Maiuri P, Lafaurie-Janvore J, Divoux S, Piel M, Perez F. 2014. ESCRT machinery is  
1034 required for plasma membrane repair. *Science* 343:1247136.
- 1035 42. Wollert T, Wunder C, Lippincott-Schwartz J, Hurley JH. 2009. Membrane scission by the  
1036 ESCRT-III complex. *Nature* 458:172-7.
- 1037 43. Isono E. 2021. ESCRT Is a Great Sealer: Non-Endosomal Function of the ESCRT Machinery in  
1038 Membrane Repair and Autophagy. *Plant Cell Physiol* 62:766-774.
- 1039 44. Nakayama K. 2016. Regulation of cytokinesis by membrane trafficking involving small GTPases  
1040 and the ESCRT machinery. *Crit Rev Biochem Mol Biol* 51:1-6.
- 1041 45. Hurley JH, Hanson PI. 2010. Membrane budding and scission by the ESCRT machinery: it's all  
1042 in the neck. *Nat Rev Mol Cell Biol* 11:556-66.
- 1043 46. Babst M. 2011. MVB vesicle formation: ESCRT-dependent, ESCRT-independent and everything  
1044 in between. *Curr Opin Cell Biol* 23:452-7.
- 1045 47. Mordue DG, Hakansson S, Niesman I, Sibley LD. 1999. *Toxoplasma gondii* resides in a vacuole  
1046 that avoids fusion with host cell endocytic and exocytic vesicular trafficking pathways. *Exp*  
1047 *Parasitol* 92:87-99.
- 1048 48. Romano JD, Sonda S, Bergbower E, Smith ME, Coppens I. 2013. *Toxoplasma gondii* salvages  
1049 sphingolipids from the host Golgi through the rerouting of selected Rab vesicles to the  
1050 parasitophorous vacuole. *Mol Biol Cell* 24:1974-95.
- 1051 49. Romano JD, Hartman EJ, Coppens I. 2021. Quantitative Fluorescence Microscopy for Detecting  
1052 Mammalian Rab Vesicles within the Parasitophorous Vacuole of the Human Pathogen  
1053 *Toxoplasma gondii*. *Methods Mol Biol* 2293:295-305.
- 1054 50. Vietri M, Radulovic M, Stenmark H. 2020. The many functions of ESCRTs. *Nat Rev Mol Cell*  
1055 *Biol* 21:25-42.
- 1056 51. Cygan AM, Jean Beltran PM, Branon TC, Ting AY, Carr SA, Boothroyd JC. 2021. Proximity-  
1057 labeling reveals novel host and parasite proteins at the *Toxoplasma* parasitophorous vacuole  
1058 membrane. doi: <https://doi.org/10.1101/2021.02.02.429490>
- 1059 52. Caffaro CE, Boothroyd JC. 2011. Evidence for host cells as the major contributor of lipids in the  
1060 intravacuolar network of *Toxoplasma*-infected cells. *Eukaryot Cell* 10:1095-9.
- 1061 53. Romano JD, Mayoral J, Guevara RB, Rivera-Cuevas Y, Carruthers VB, Weiss LM, Coppens I.  
1062 2021. Role for Mammalian ESCRT-III machinery in the sequestration of mammalian Rab  
1063 vesicles into the parasitophorous vacuole of the intracellular pathogen *Toxoplasma*. *Mol Biol Cell*  
1064 28.
- 1065 54. Pornillos O, Higginson DS, Stray KM, Fisher RD, Garrus JE, Payne M, He GP, Wang HE,  
1066 Morham SG, Sundquist WI. 2003. HIV Gag mimics the Tsg101-recruiting activity of the human  
1067 Hrs protein. *J Cell Biol* 162:425-34.
- 1068 55. von Schwedler UK, Stuchell M, Muller B, Ward DM, Chung HY, Morita E, Wang HE, Davis T,  
1069 He GP, Cimbara DM, Scott A, Krausslich HG, Kaplan J, Morham SG, Sundquist WI. 2003. The  
1070 protein network of HIV budding. *Cell* 114:701-13.
- 1071 56. Ren X, Hurley JH. 2011. Proline-rich regions and motifs in trafficking: from ESCRT interaction  
1072 to viral exploitation. *Traffic* 12:1282-90.

- 1073 57. Shields SB, Piper RC. 2011. How ubiquitin functions with ESCRTs. *Traffic* 12:1306-17.
- 1074 58. Katzmann DJ, Babst M, Emr SD. 2001. Ubiquitin-dependent sorting into the multivesicular body  
1075 pathway requires the function of a conserved endosomal protein sorting complex, ESCRT-I. *Cell*  
1076 106:145-55.
- 1077 59. Gallagher E, Gao M, Liu YC, Karin M. 2006. Activation of the E3 ubiquitin ligase Itch through a  
1078 phosphorylation-induced conformational change. *Proc Natl Acad Sci U S A* 103:1717-22.
- 1079 60. Stohr R, Mavilio M, Marino A, Casagrande V, Kappel B, Mollmann J, Menghini R, Melino G,  
1080 Federici M. 2015. ITCH modulates SIRT6 and SREBP2 to influence lipid metabolism and  
1081 atherosclerosis in ApoE null mice. *Sci Rep* 5:9023.
- 1082 61. Angers A, Ramjaun AR, McPherson PS. 2004. The HECT domain ligase itch ubiquitinates  
1083 endophilin and localizes to the trans-Golgi network and endosomal system. *J Biol Chem*  
1084 279:11471-9.
- 1085 62. Han Z, Sagum CA, Bedford MT, Sidhu SS, Sudol M, Harty RN. 2016. ITCH E3 Ubiquitin Ligase  
1086 Interacts with Ebola Virus VP40 To Regulate Budding. *J Virol* 90:9163-71.
- 1087 63. Su WC, Chen YC, Tseng CH, Hsu PW, Tung KF, Jeng KS, Lai MM. 2013. Pooled RNAi screen  
1088 identifies ubiquitin ligase Itch as crucial for influenza A virus release from the endosome during  
1089 virus entry. *Proc Natl Acad Sci U S A* 110:17516-21.
- 1090 64. Li A, Gao, X., Ren, J., Jin, C., Xue, Y. . 2009. BDM-PUB: Computational prediction of protein  
1091 ubiquitination sites with a Bayesian discriminant method.  
1092 <https://bdmpub.biocuckoo.org/prediction.php> Accessed
- 1093 65. Fox BA, Guevara RB, Rommereim LM, Falla A, Bellini V, Petre G, Rak C, Cantillana V,  
1094 Dubremetz JF, Cesbron-Delauw MF, Taylor GA, Mercier C, Bzik DJ. 2019. Toxoplasma gondii  
1095 parasitophorous vacuole membrane-associated dense granule proteins orchestrate chronic  
1096 infection and GRA12 underpins resistance to host IFN- $\gamma$ . *mBio* 10.
- 1097 66. Fox BA, Falla A, Rommereim LM, Tomita T, Gigley JP, Mercier C, Cesbron-Delauw MF, Weiss  
1098 LM, Bzik DJ. 2011. Type II Toxoplasma gondii KU80 knockout strains enable functional  
1099 analysis of genes required for cyst development and latent infection. *Eukaryot Cell* 10:1193-206.
- 1100 67. Tomita T, Bzik DJ, Ma YF, Fox BA, Markillie LM, Taylor RC, Kim K, Weiss LM. 2013. The  
1101 Toxoplasma gondii cyst wall protein CST1 is critical for cyst wall integrity and promotes  
1102 bradyzoite persistence. *PLoS Pathog* 9:e1003823.
- 1103 68. Nolan SJ, Romano JD, Coppens I. 2017. Host lipid droplets: An important source of lipids  
1104 salvaged by the intracellular parasite Toxoplasma gondii. *PLoS Pathog* 13:e1006362.
- 1105 69. Coppens I, Sinai AP, Joiner KA. 2000. Toxoplasma gondii exploits host low-density lipoprotein  
1106 receptor-mediated endocytosis for cholesterol acquisition. *J Cell Biol* 149:167-80.
- 1107 70. Sciarretta C, Minichiello L. 2010. The preparation of primary cortical neuron cultures and a  
1108 practical application using immunofluorescent cytochemistry. *Methods Mol Biol* 633:221-31.
- 1109 71. Shen B, Brown K, Long S, Sibley LD. 2017. Development of CRISPR/Cas9 for Efficient  
1110 Genome Editing in Toxoplasma gondii. *Methods Mol Biol* 1498:79-103.
- 1111 72. Tu V, Tomita T, Sugi T, Mayoral J, Han B, Yakubu RR, Williams T, Horta A, Ma Y, Weiss LM.  
1112 2020. The Toxoplasma gondii Cyst Wall Interactome. *mBio* 11.
- 1113 73. van den Hoff MJ, Moorman AF, Lamers WH. 1992. Electroporation in 'intracellular' buffer  
1114 increases cell survival. *Nucleic Acids Res* 20:2902.
- 1115 74. Mastronarde DN. 2005. Automated electron microscope tomography using robust prediction of  
1116 specimen movements. *J Struct Biol* 152:36-51.
- 1117 75. Kremer JR, Mastronarde DN, McIntosh JR. 1996. Computer visualization of three-dimensional  
1118 image data using IMOD. *J Struct Biol* 116:71-6.
- 1119 76. Thornhill D, Olety B, Ono A. 2019. Relationships between MA-RNA Binding in Cells and  
1120 Suppression of HIV-1 Gag Mislocalization to Intracellular Membranes. *J Virol* 93.

1121

A

10 20 30 40 50 60  
 MKLFRPVYAL LALPGGALAA NYDFFVLGQP AGNGNLQSTG DTSVDPAGER EGKPNESRSK  
 70 80 90 100 110 120  
 DLEQGSTGPD YNVYYPRKQS THLLPAVQQY SLKASPCAGE GAGQYIPSLS QSPSQPLQQY  
 130 140 150 160 170 180  
 APVHSTGEAL GGSEASWKLP PHKASTETTL SQPSSSSEME TLSQTNPQQF IPVYGGNLLQ  
 190 200 210 220 230 240  
 PRPRLPGCDL DLPEPQKQKG CLVHSELRPS IILLHSGSDR DGSGKGRER RRKRRMRHQP  
 250 260 270 280 290 300  
 VDTTIDETIA EGKPPVSLKG FKTFASSLAA AALGFPIYAG ALSFLAWWRL LSSMEELGRQ  
 310 320 330  
 EEQRLARQRQ RRRKKRENLP GAEVKATESF

B

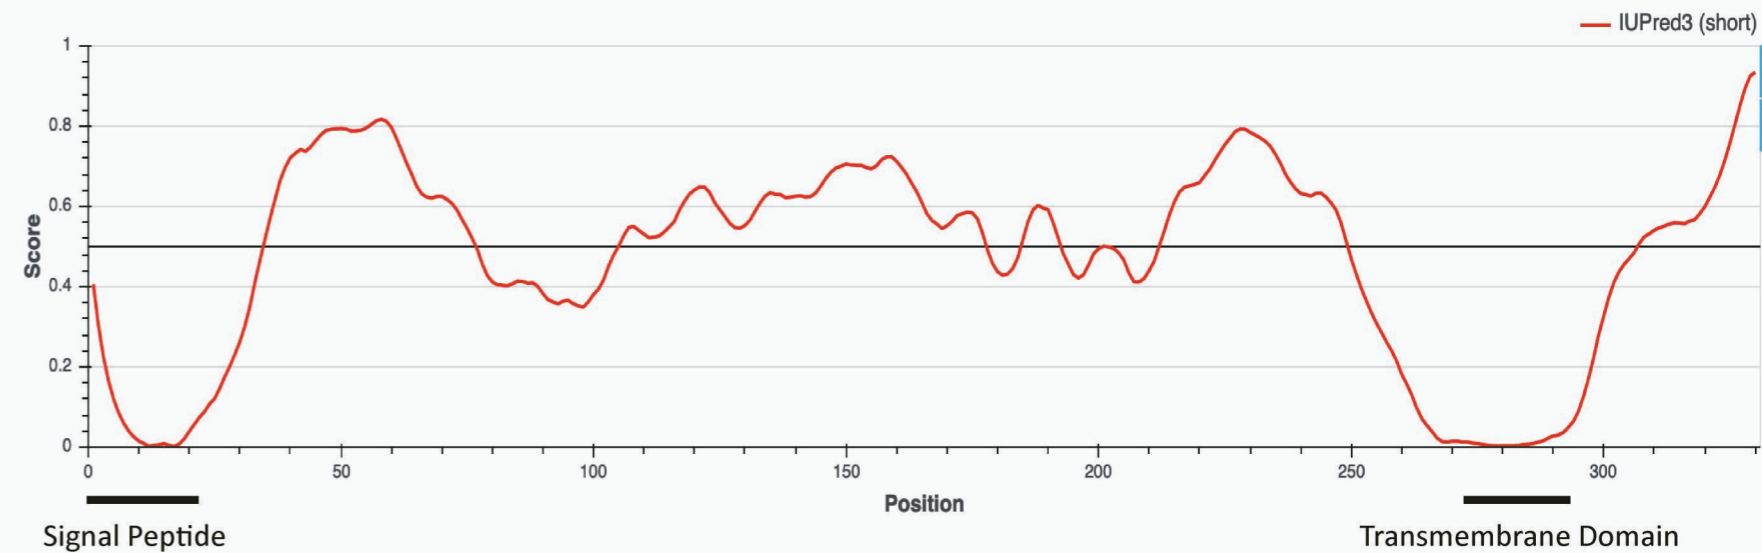

C

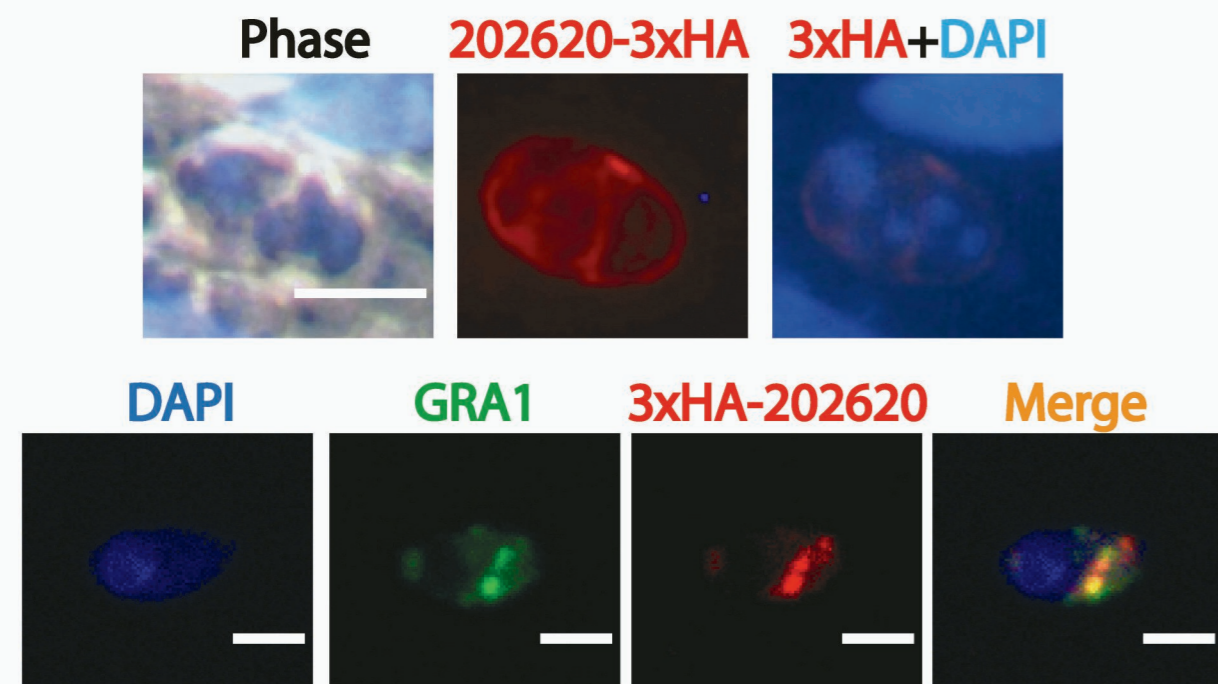

D

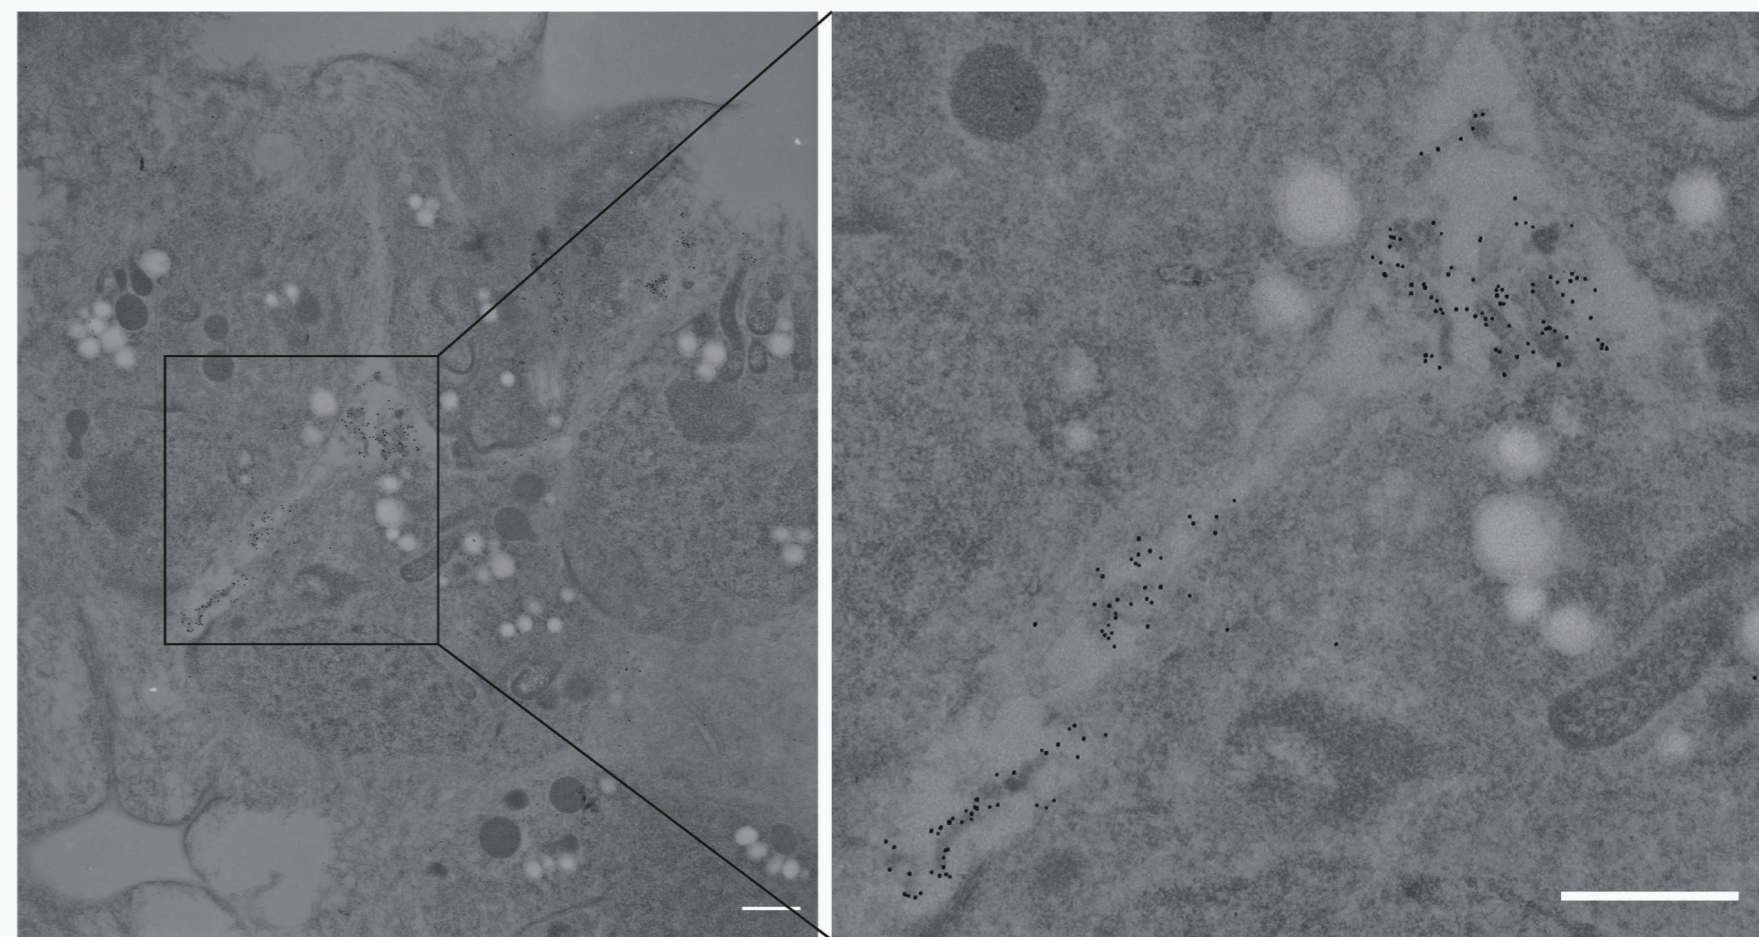

E

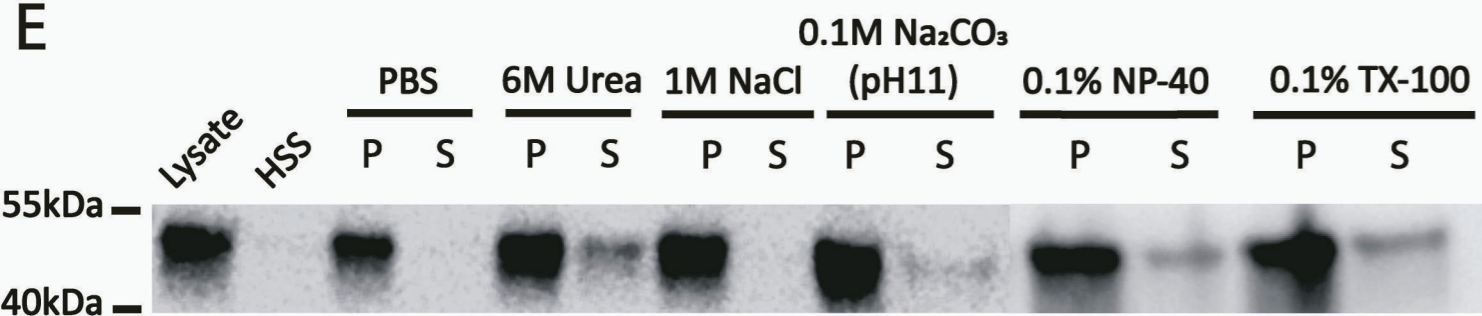

**A**

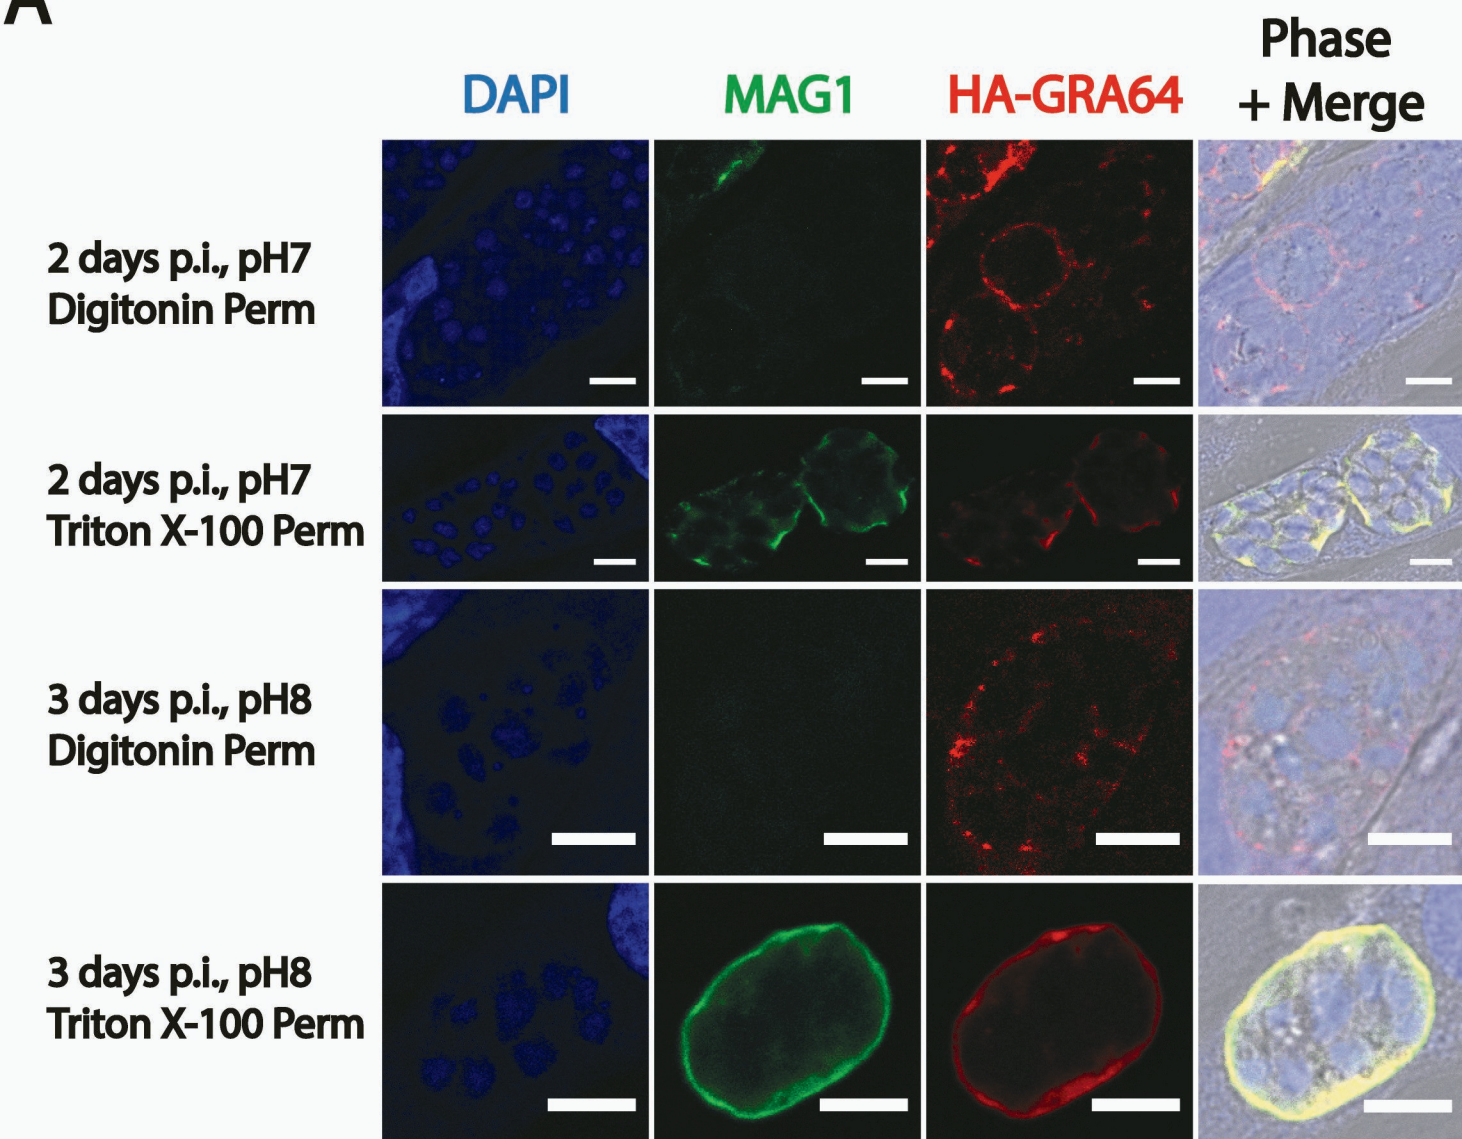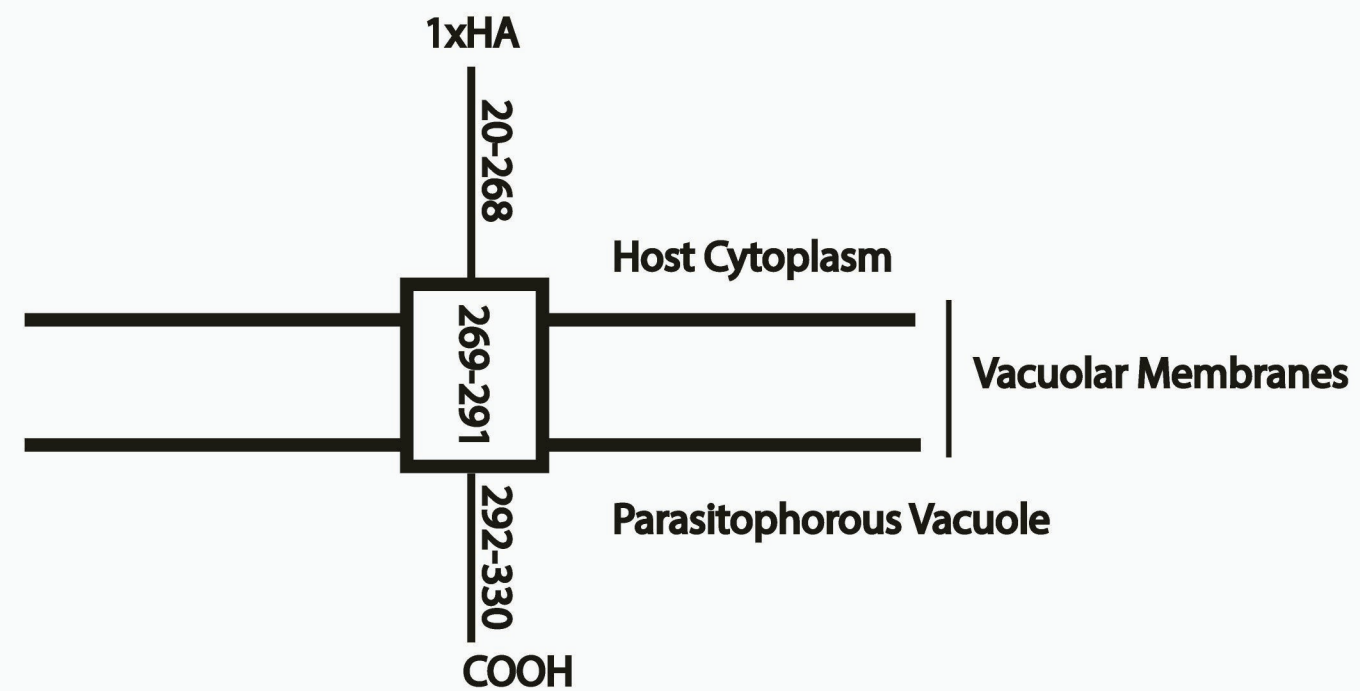

**B**

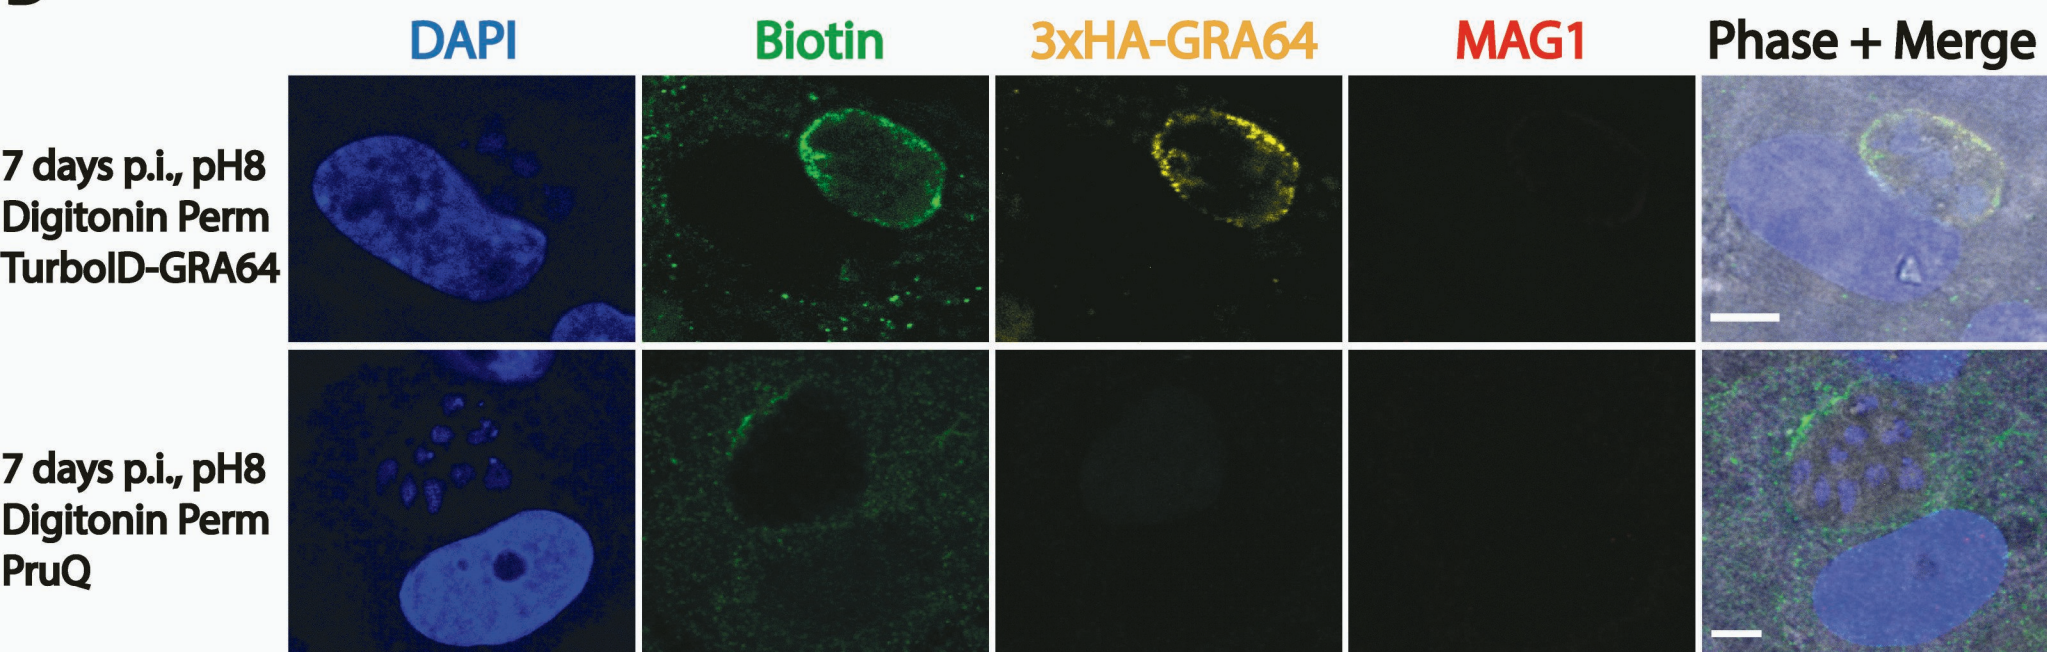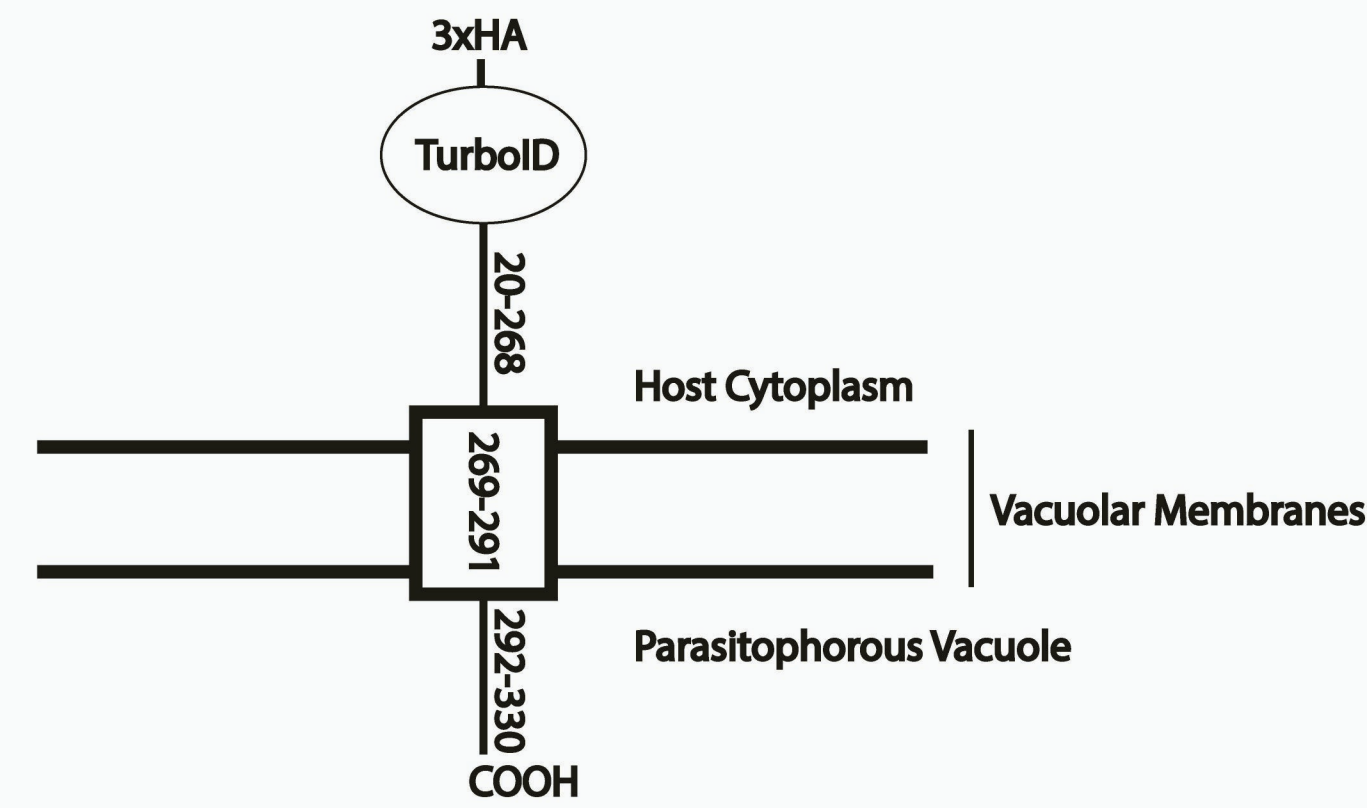



A

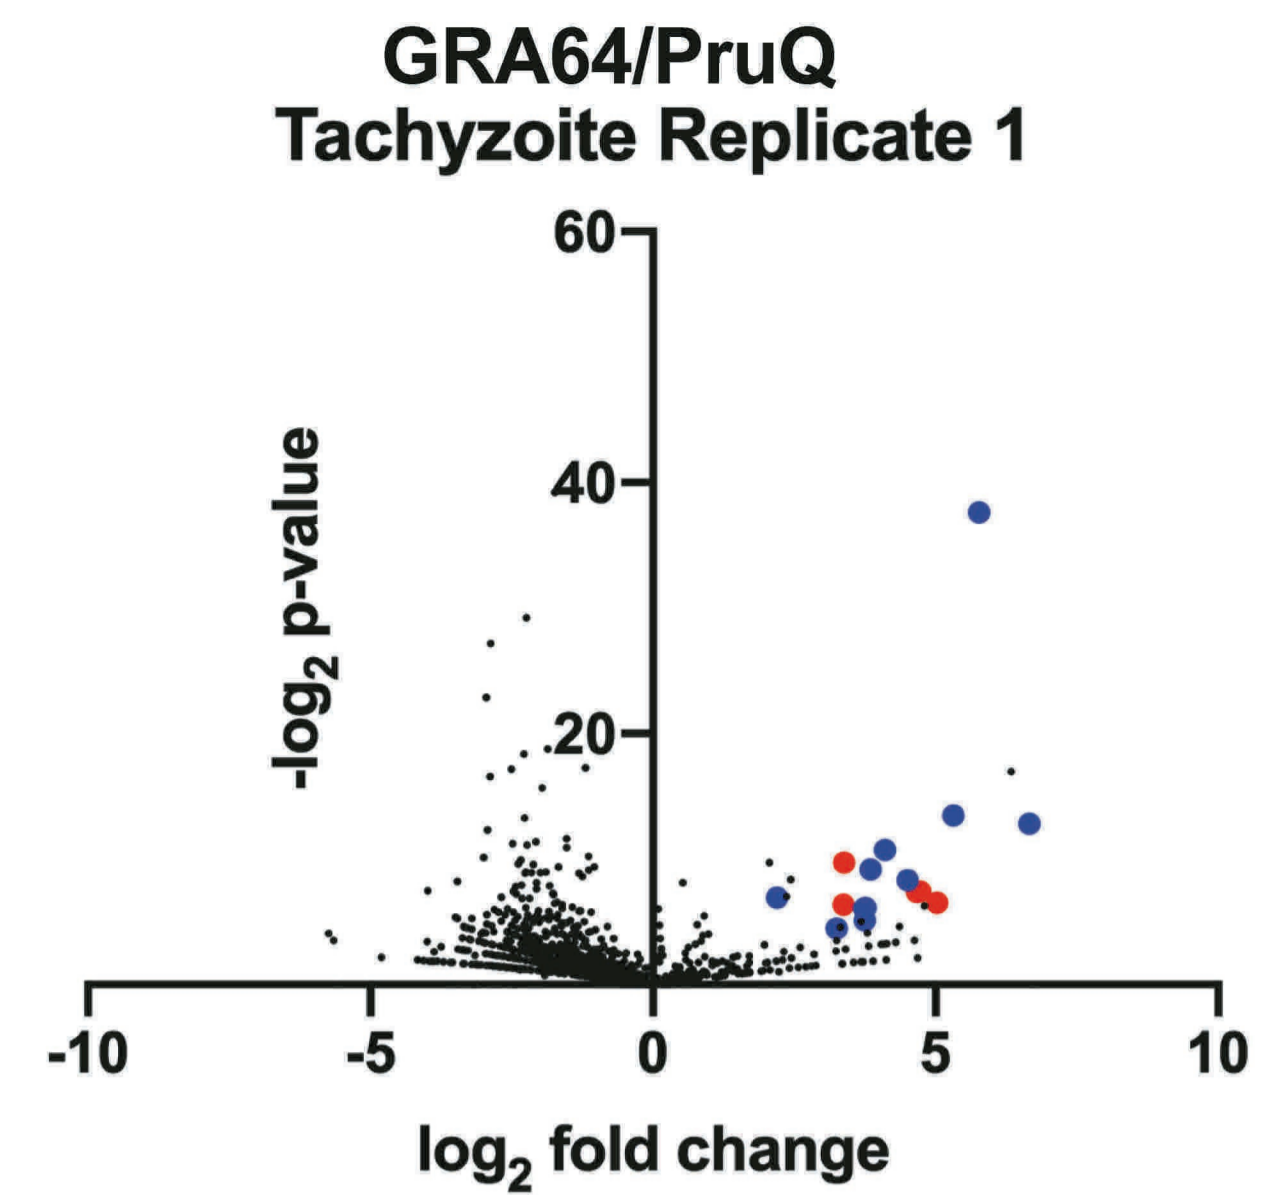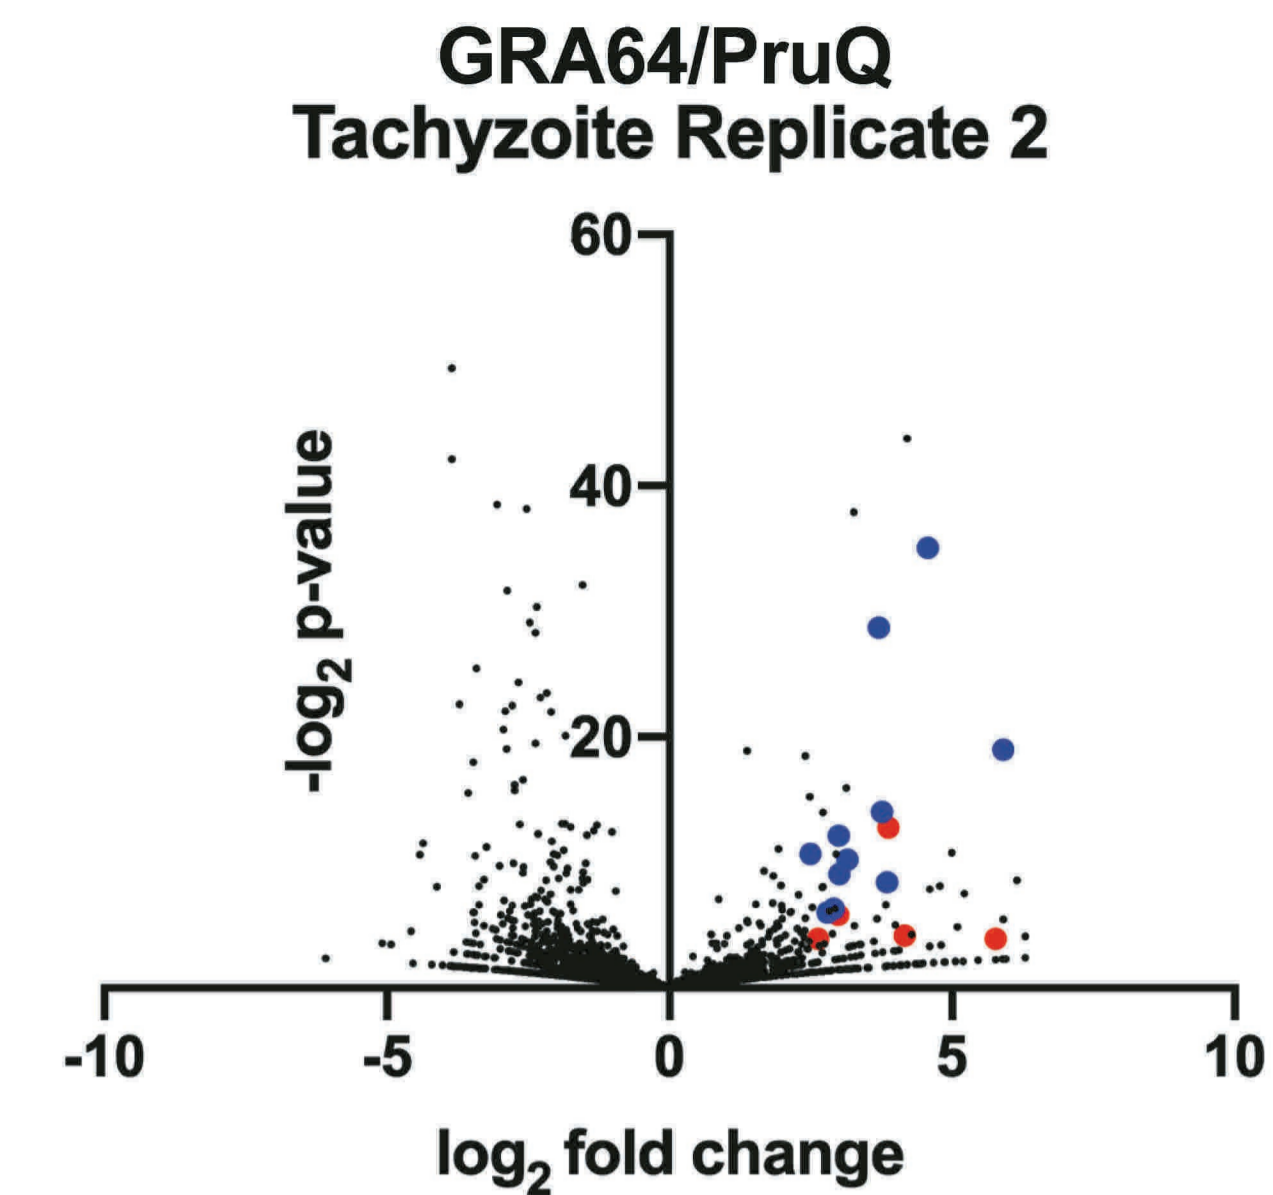

**Parasite Proteins: >2-fold enriched, <0.1 p-value**

| Protein Hits | log <sub>2</sub> Fold Change, p-value (Rep1) | log <sub>2</sub> Fold Change, p-value (Rep2) |
|--------------|----------------------------------------------|----------------------------------------------|
| GRA64        | 6.7, 0.00013                                 | 3.8, <0.0001                                 |
| MAG1         | 5.8, <0.0001                                 | 4.6, <0.0001                                 |
| MYR1         | 4.1, 0.00058                                 | 3.7, <0.0001                                 |
| GRA4         | 5.3, <0.0001                                 | 3.8, 0.00286                                 |
| GRA7         | 2.2, 0.00834                                 | 3.1, 0.00083                                 |
| GRA8         | 3.7, 0.01483                                 | 2.9, 0.01256                                 |
| GRA9         | 3.9, 0.00175                                 | 2.5, 0.00062                                 |
| GRA12        | 3.8, 0.01451                                 | 3.0, 0.00186                                 |
| GRA14        | 3.3, 0.04434                                 | 2.8, 0.01507                                 |
| GRA15        | 3.3, 0.04434                                 | 2.8, 0.01507                                 |
| GRA34        | 4.5, 0.00317                                 | 3.0, 0.00022                                 |

**Host Cell Proteins: >2-fold enriched, <0.1 p-value**

| Protein Hits | log <sub>2</sub> Fold Change, p-value (Rep1) | log <sub>2</sub> Fold Change, p-value (Rep2) |
|--------------|----------------------------------------------|----------------------------------------------|
| TSG101       | 3.4, 0.00119                                 | 3.9, 0.00014                                 |
| VPS37A       | 4.7, 0.00578                                 | 3.0, 0.01731                                 |
| VPS28        | 3.4, 0.01203                                 | 4.2, 0.05525                                 |
| CHMP4B       | 4.7, 0.00608                                 | 2.6, 0.06476                                 |
| PEF1         | 5.0, 0.01100                                 | 5.8, 0.06683                                 |

ESCRT-I  
ESCRT-III  
ESCRT-associated

B

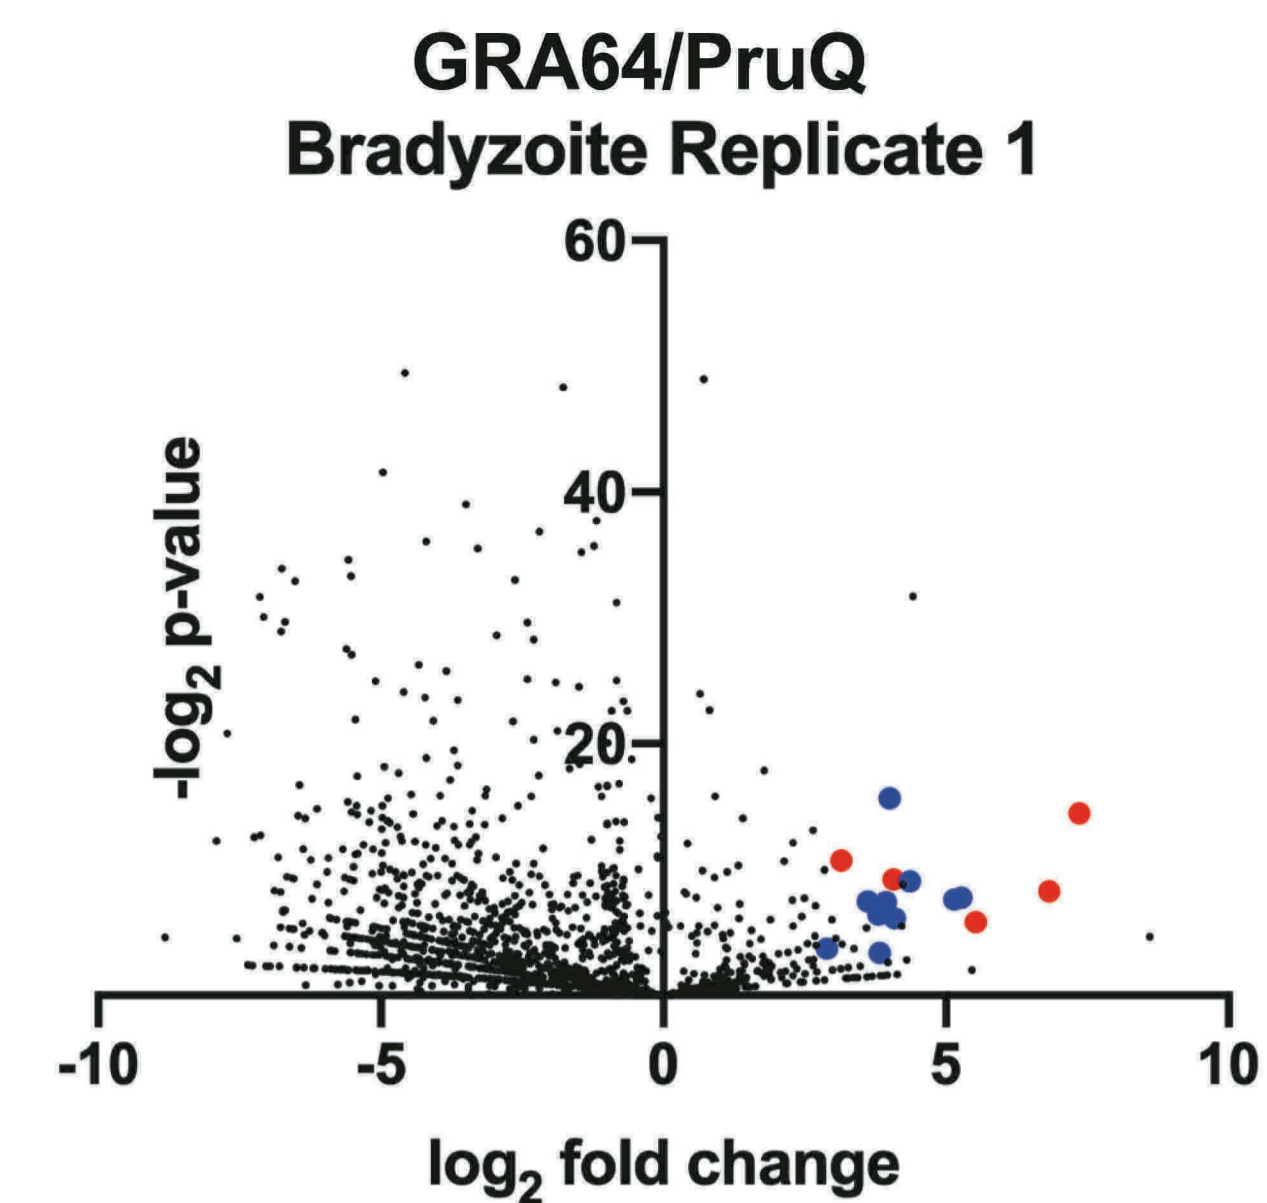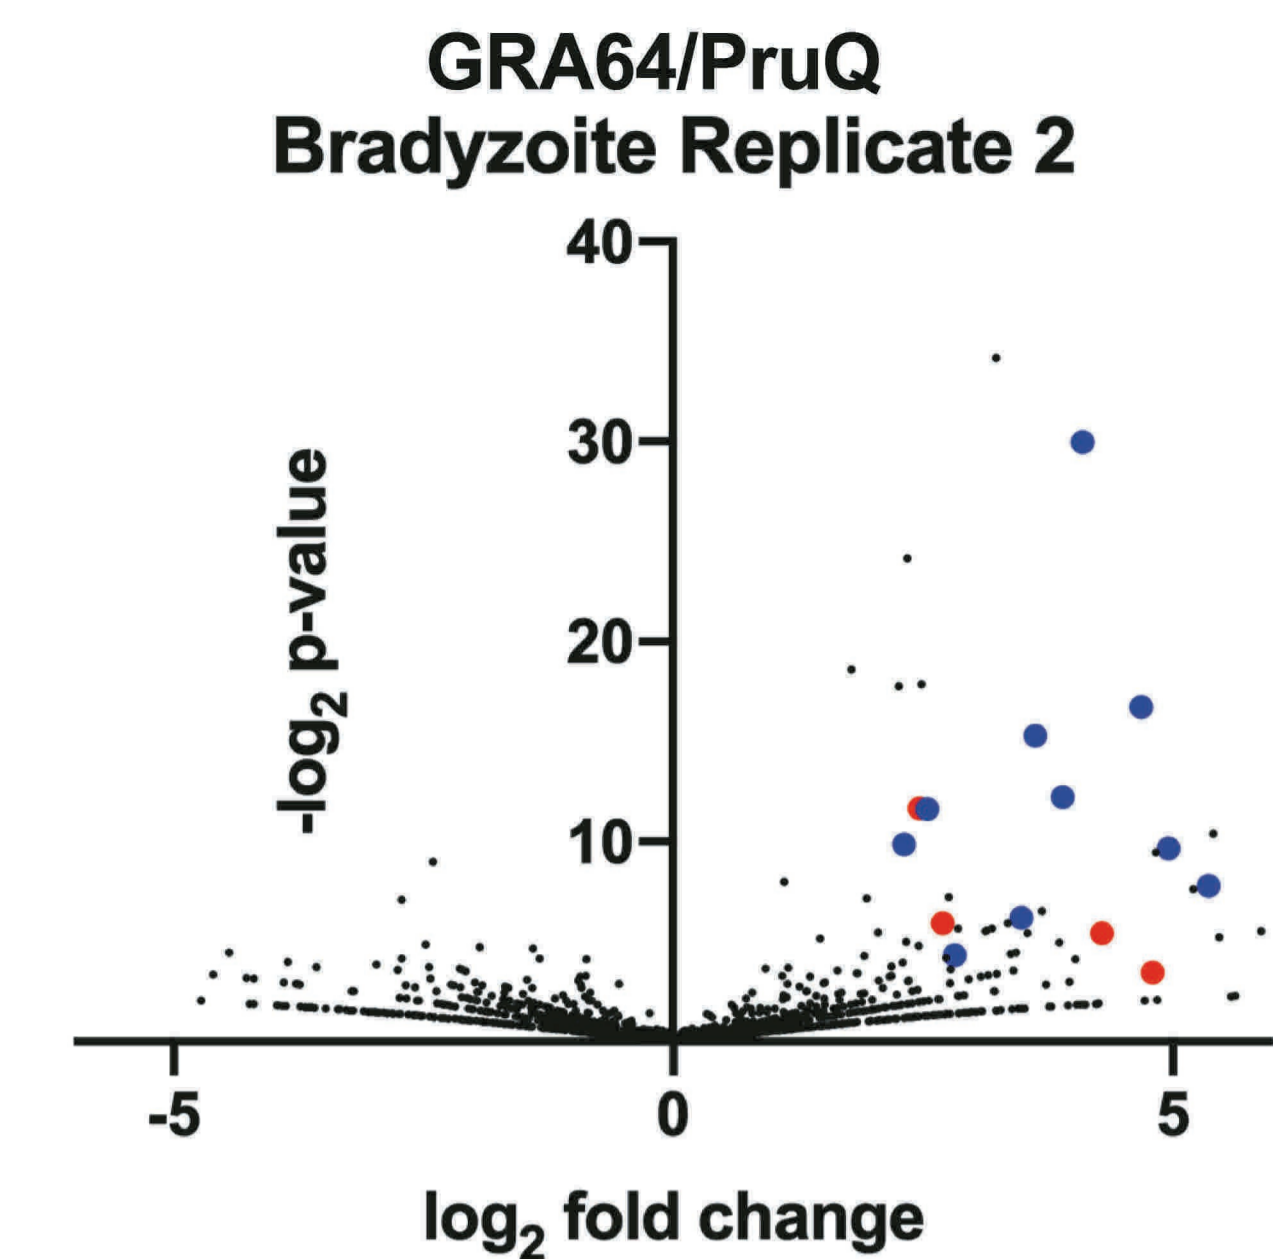

**Parasite Proteins: >2-fold enriched, <0.1 p-value**

| Protein Hits  | log <sub>2</sub> Fold Change, p-value (Rep1) | log <sub>2</sub> Fold Change, p-value (Rep2) |
|---------------|----------------------------------------------|----------------------------------------------|
| GRA64         | 5.2, 0.00457                                 | 3.9, 0.00021                                 |
| MAG1          | 4.0, <0.0001                                 | 4.1, <0.0001                                 |
| MYR1          | 4.4, 0.00187                                 | 2.3, 0.00108                                 |
| GRA4          | 3.9, 0.00585                                 | 2.8, 0.05011                                 |
| GRA8          | 5.1, 0.00513                                 | 3.5, 0.01386                                 |
| GRA9          | 3.6, 0.00570                                 | 3.6, <0.0001                                 |
| GRA34         | 4.1, 0.01426                                 | 4.7, <0.0001                                 |
| CST7          | 3.8, 0.01163                                 | 2.5, 0.00031                                 |
| GRA58         | 2.9, 0.07554                                 | 5.0, 0.00123                                 |
| TGME49_291630 | 3.8, 0.09484                                 | 5.4, 0.00451                                 |

**Host Cell Proteins: >2-fold enriched, <0.1 p-value**

| Protein Hits | log <sub>2</sub> Fold Change, p-value (Rep1) | log <sub>2</sub> Fold Change, p-value (Rep2) |
|--------------|----------------------------------------------|----------------------------------------------|
| TSG101       | 4.1, 0.00167                                 | 2.7, 0.01668                                 |
| PEF1         | 6.8, 0.00327                                 | 6.3, 0.05583                                 |
| UMAD1        | 5.5, 0.01760                                 | 4.8, 0.09038                                 |
| PDCD6        | 7.4, <0.0001                                 | 4.3, 0.02332                                 |
| KRT16        | 3.1, 0.00059                                 | 2.5, 0.00031                                 |

ESCRT-I  
ESCRT-associated  
ESCRT-I  
ESCRT-associated

C

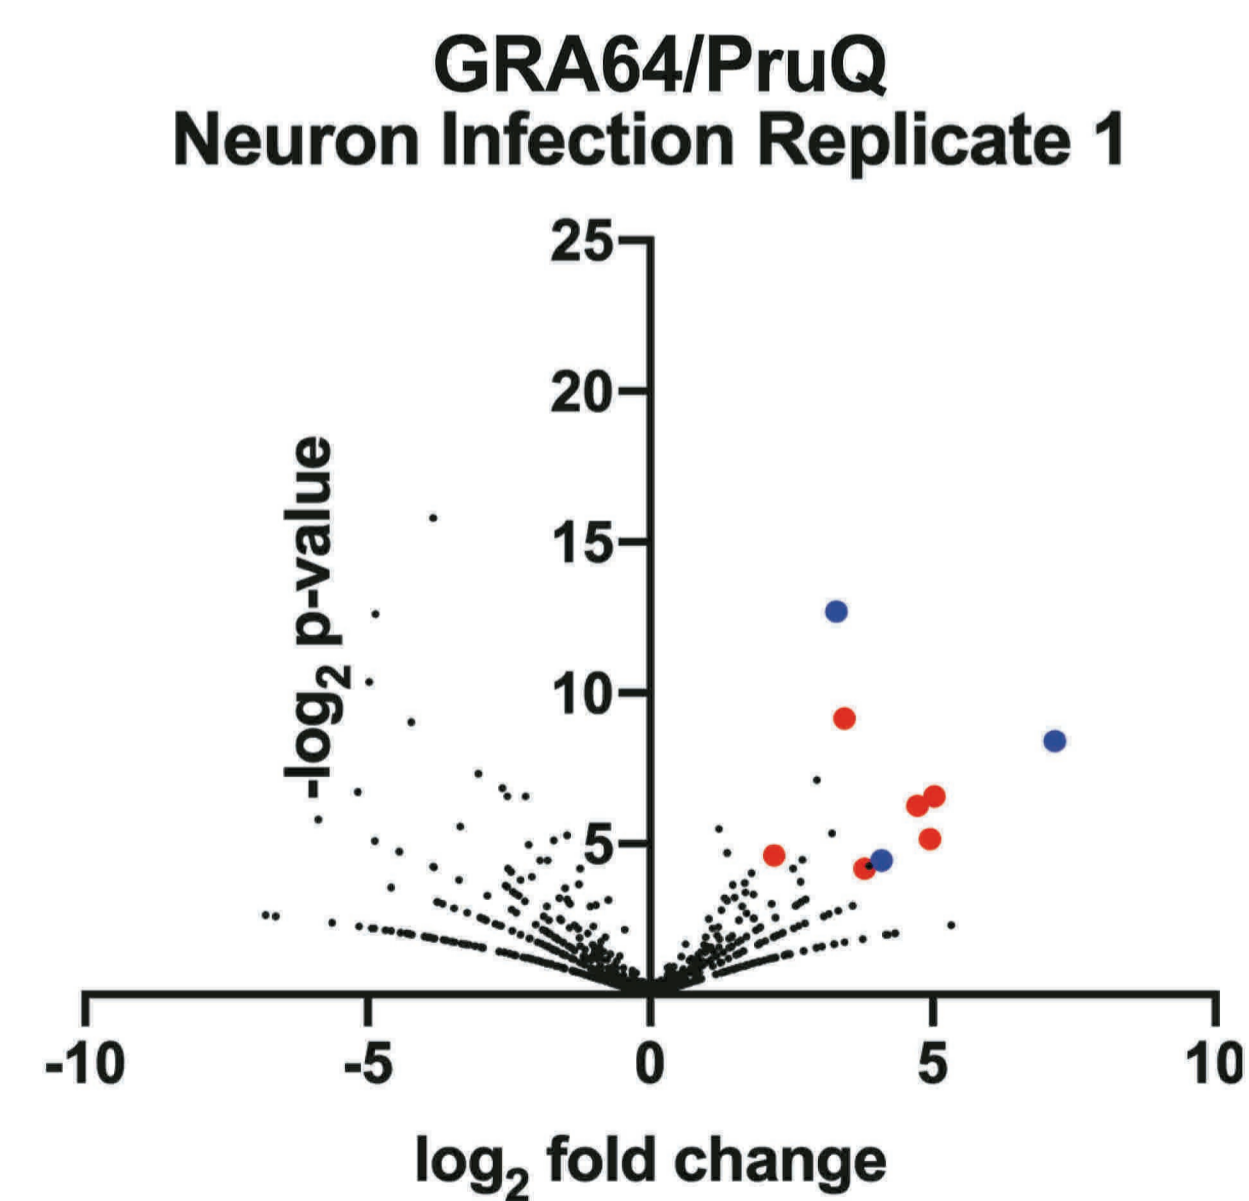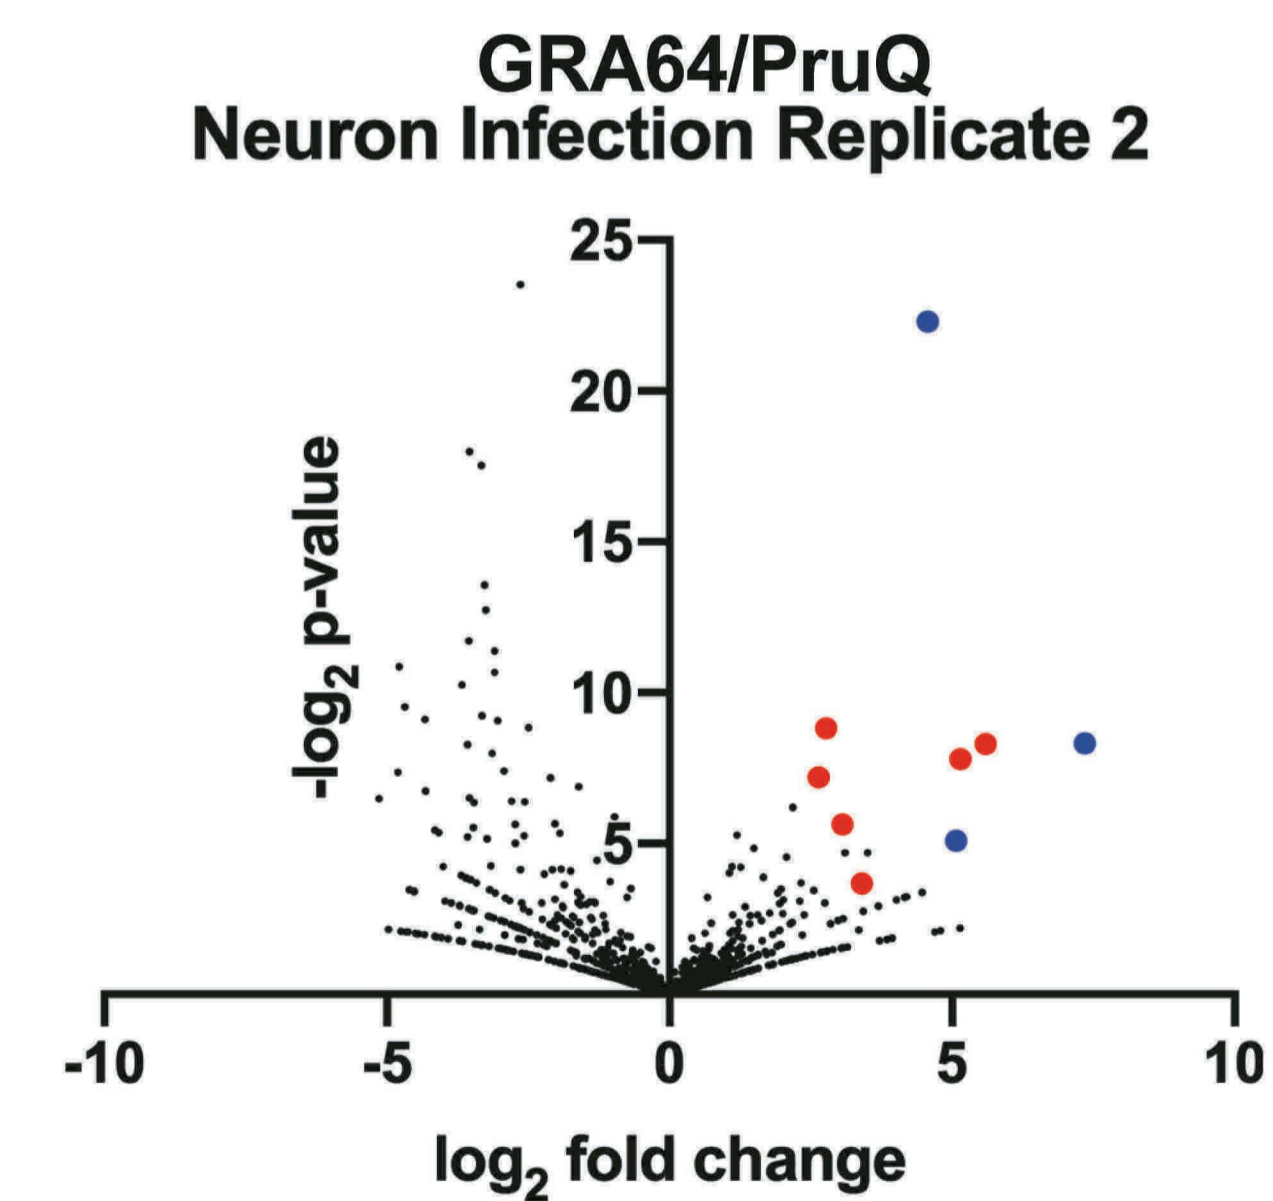

**Parasite Proteins: >2-fold enriched, <0.1 p-value**

| Protein Hits | log <sub>2</sub> Fold Change, p-value (Rep1) | log <sub>2</sub> Fold Change, p-value (Rep2) |
|--------------|----------------------------------------------|----------------------------------------------|
| MAG1         | 3.3, 0.00015                                 | 4.6, <0.0001                                 |
| GRA1         | 7.2, 0.00295                                 | 7.4, 0.00311                                 |
| GRA9         | 4.1, 0.04551                                 | 5.1, 0.02930                                 |

**Host Cell Proteins: >2-fold enriched, <0.1 p-value**

| Protein Hits | log <sub>2</sub> Fold Change, p-value (Rep1) | log <sub>2</sub> Fold Change, p-value (Rep2) |
|--------------|----------------------------------------------|----------------------------------------------|
| Basp1        | 3.4, 0.00176                                 | 2.8, 0.00222                                 |
| Apoe         | 3.8, 0.05505                                 | 3.4, 0.07785                                 |
| Stmn1        | 4.9, 0.02813                                 | 3.1, 0.02022                                 |
| Mapt         | 2.2, 0.04087                                 | 2.6, 0.00681                                 |
| Chmp4B       | 4.7, 0.01303                                 | 5.6, 0.00316                                 |
| Pdcd6        | 5.0, 0.01052                                 | 5.2, 0.00451                                 |

ESCRT-III  
ESCRT-associated

D

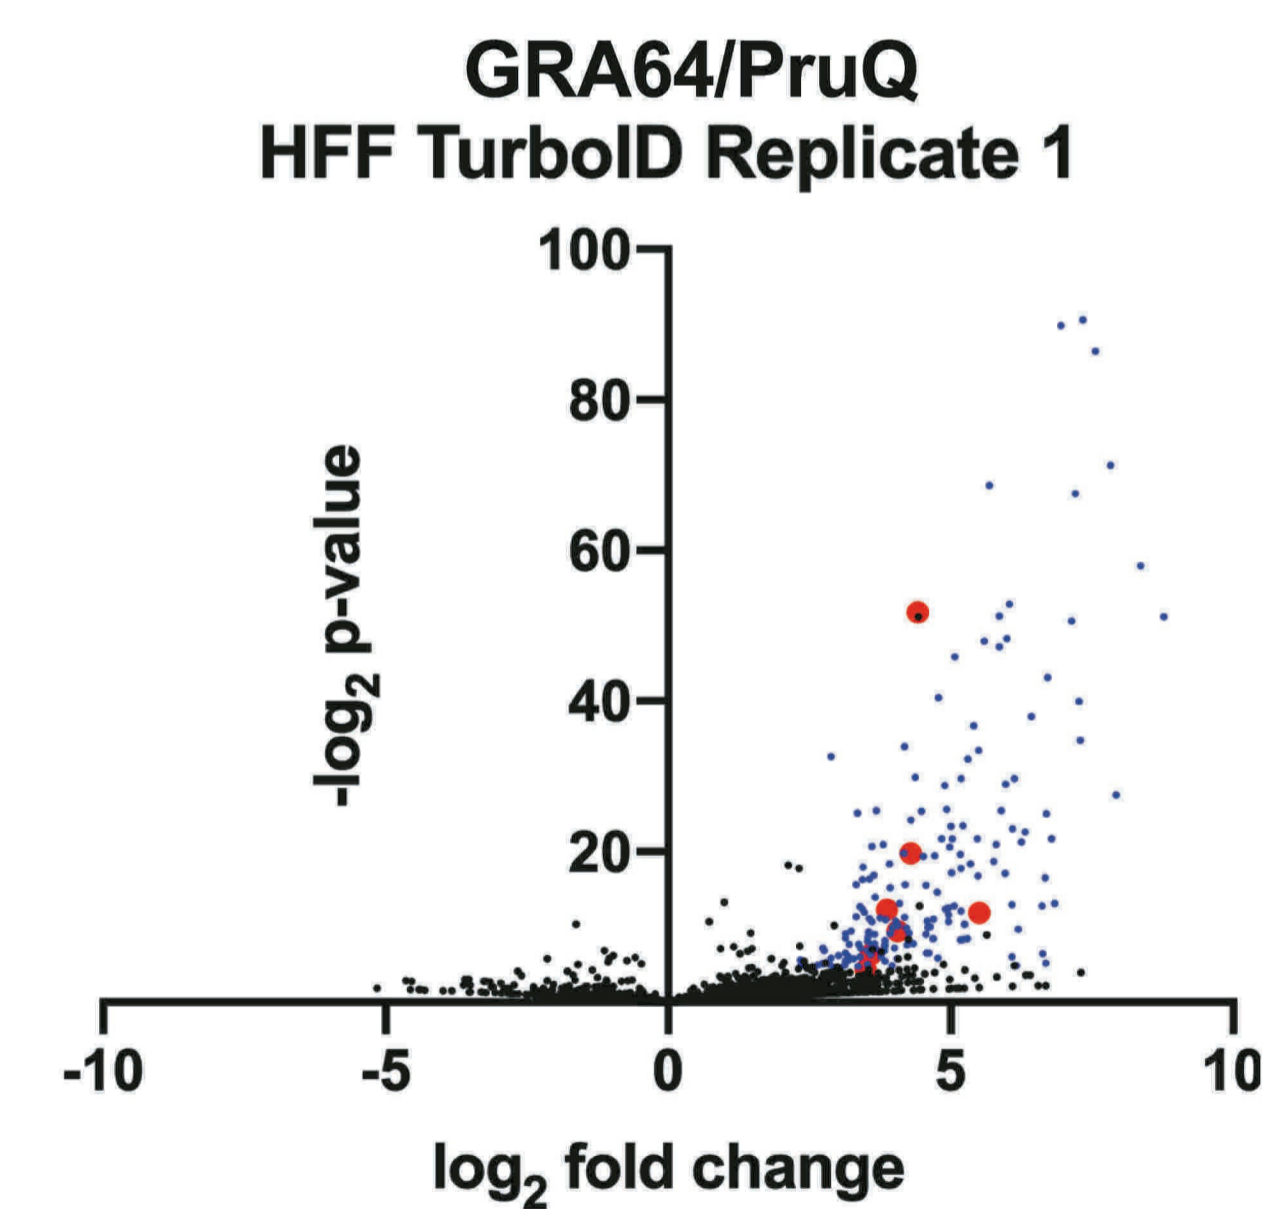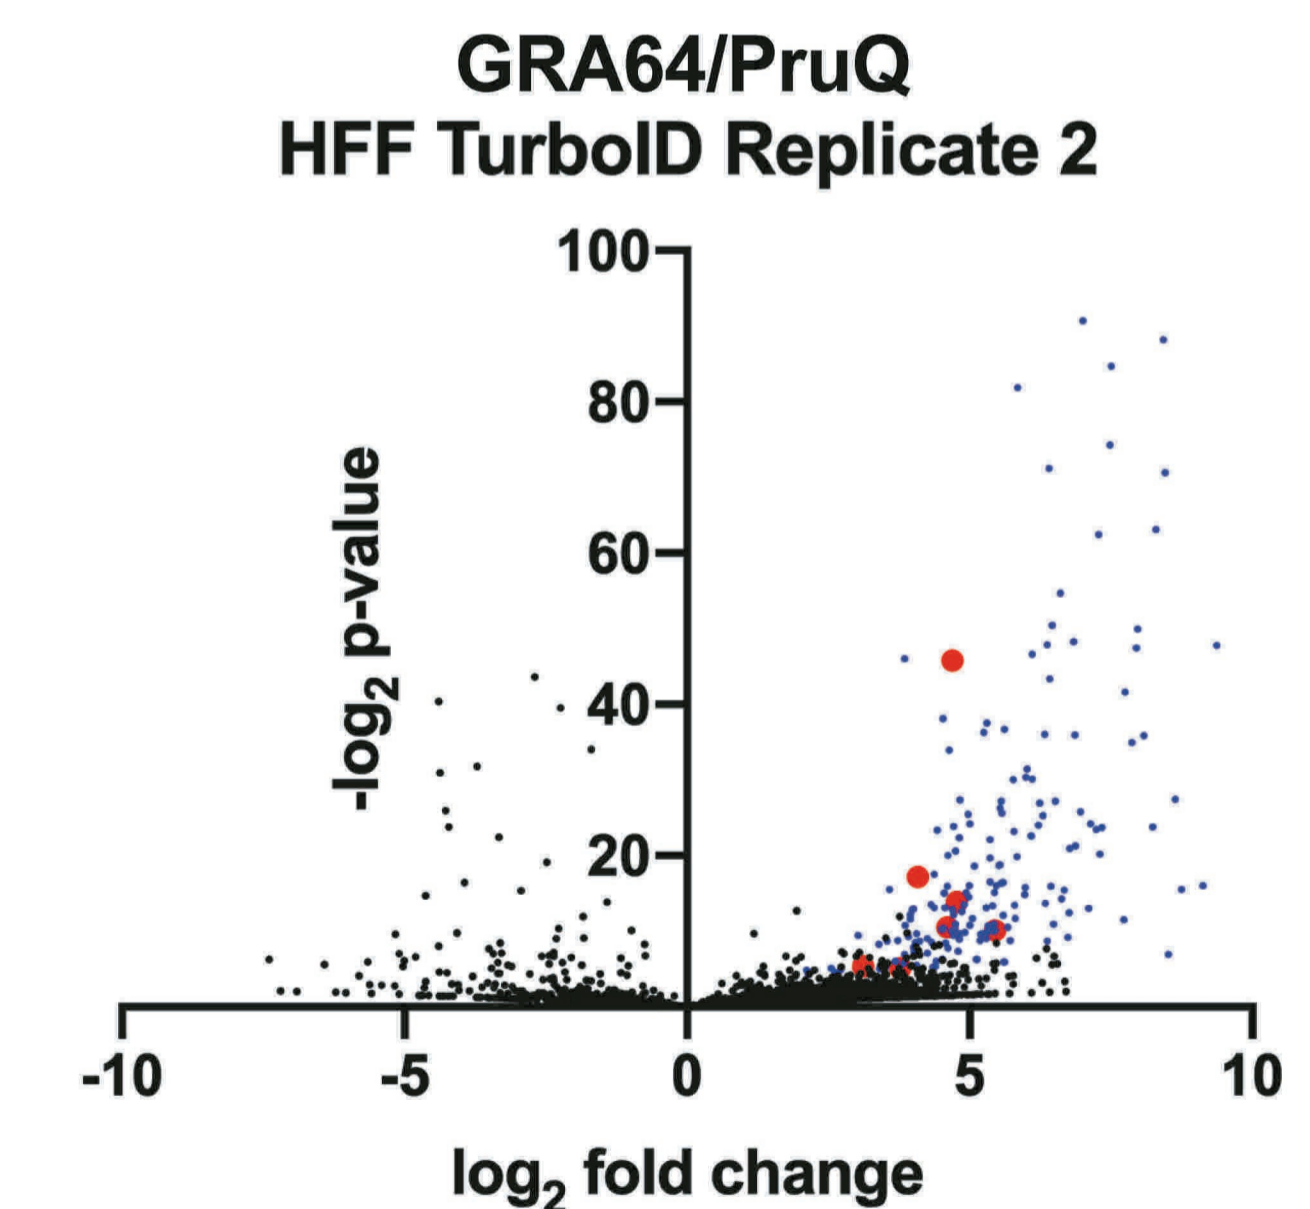

**Host Cell Proteins: >2-fold enriched, <0.1 p-value**

| Protein Hits | log <sub>2</sub> Fold Change, p-value (Rep1) | log <sub>2</sub> Fold Change, p-value (Rep2) |
|--------------|----------------------------------------------|----------------------------------------------|
| ALIX         | 4.4, <0.0001                                 | 4.7, <0.0001                                 |
| IFI16        | 4.3, <0.0001                                 | 4.1, <0.0001                                 |
| ITCH         | 3.9, 0.00019                                 | 4.7, <0.0001                                 |
| TSG101       | 4.1, 0.00143                                 | 4.6, 0.00065                                 |
| VPS37A       | 5.5, 0.00027                                 | 5.5, 0.00088                                 |
| UBAP1        | 3.5, 0.05007                                 | 3.8, 0.02856                                 |
| TAGLN        | 3.6, 0.01201                                 | 3.1, 0.02352                                 |

ESCRT-associated  
ESCRT-I

**A**

### $\alpha$ HA Co-IP HFF Infection

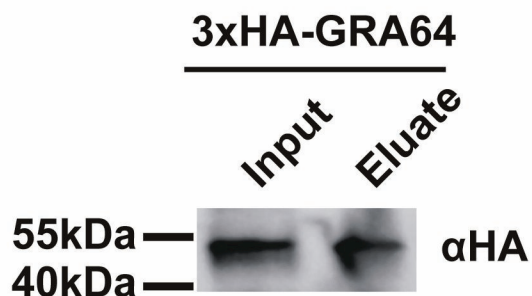

### $\alpha$ HA Co-IP Neuron Infection

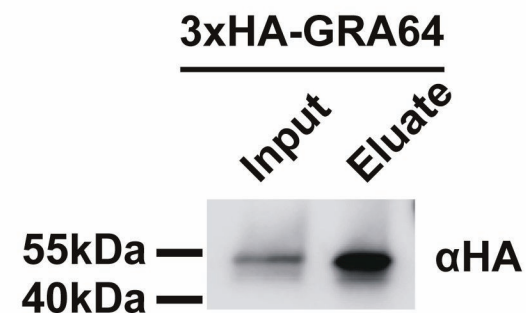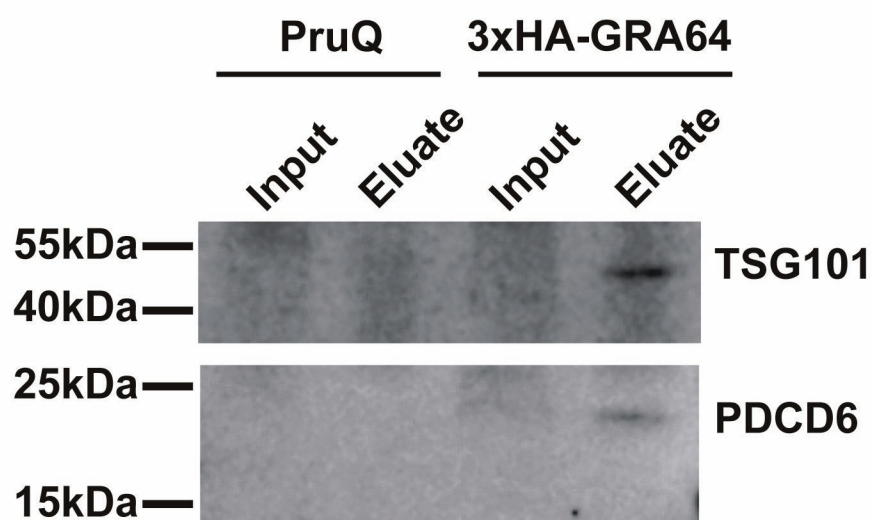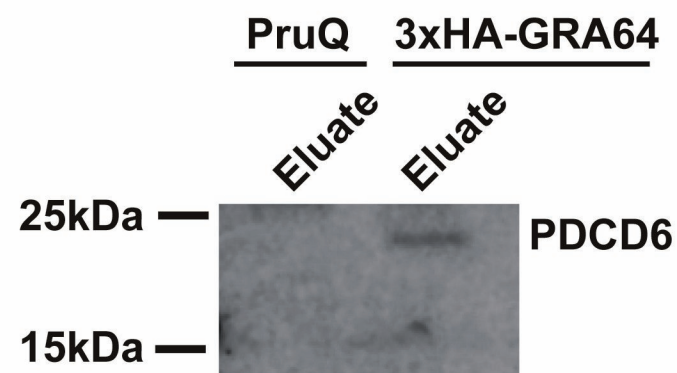

**B**

### $\alpha$ CHMP4B Co-IP HFF Infection

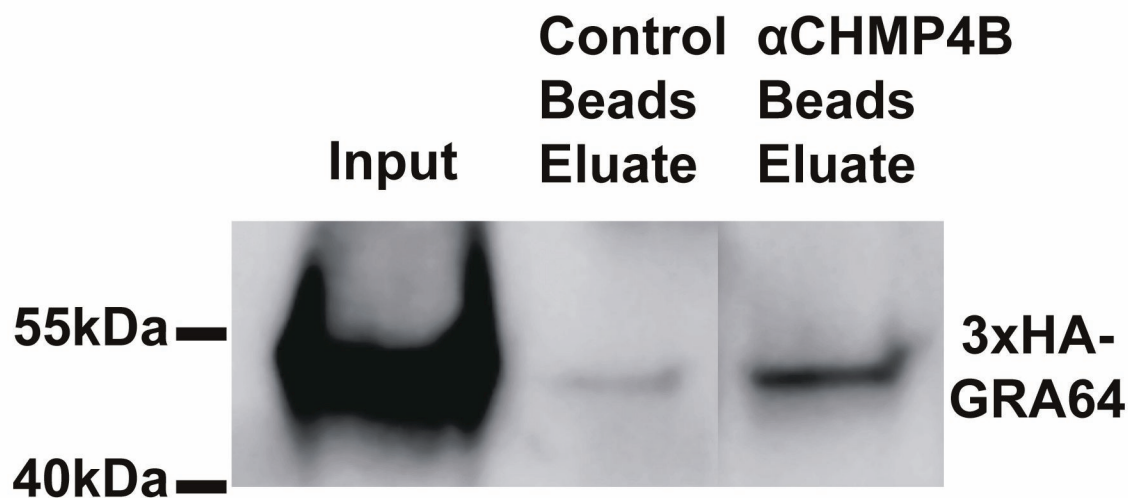

**A**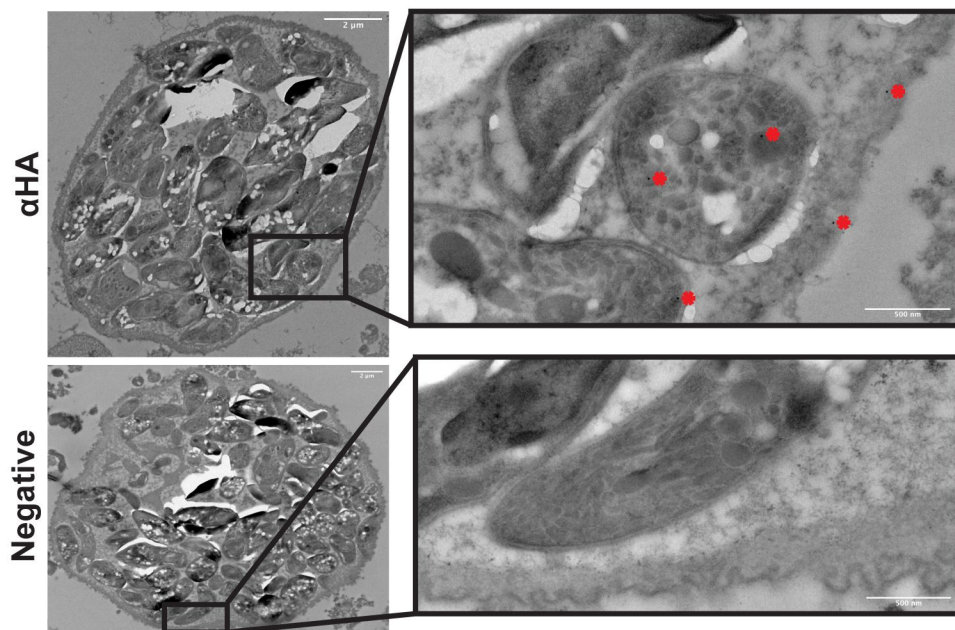**B****ME49Q**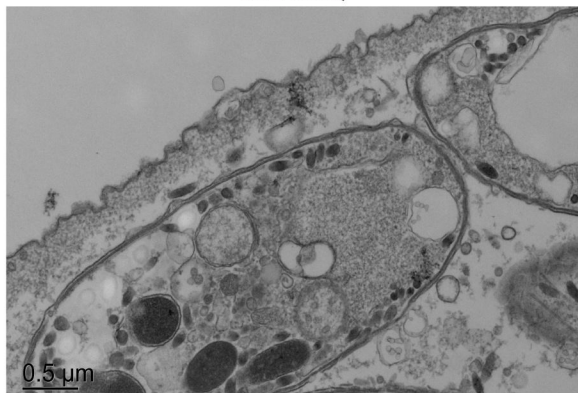 **$\Delta$ gra64**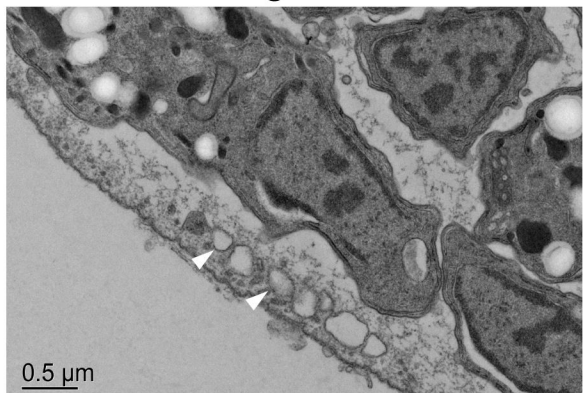**3xHA-GRA64**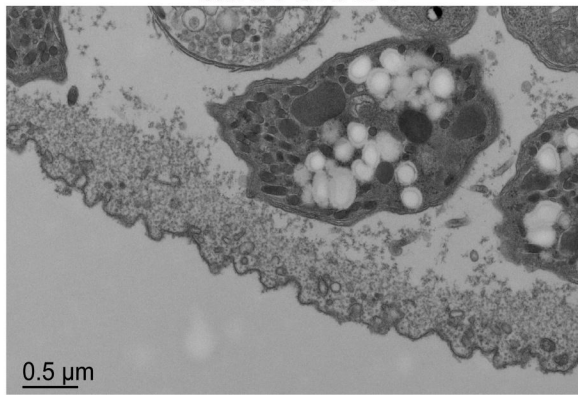**GRA64-COMP**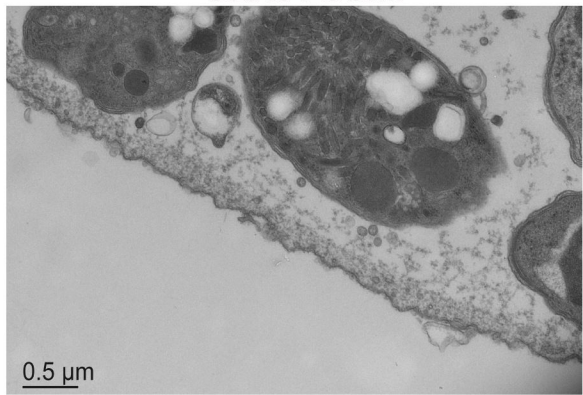

**A**

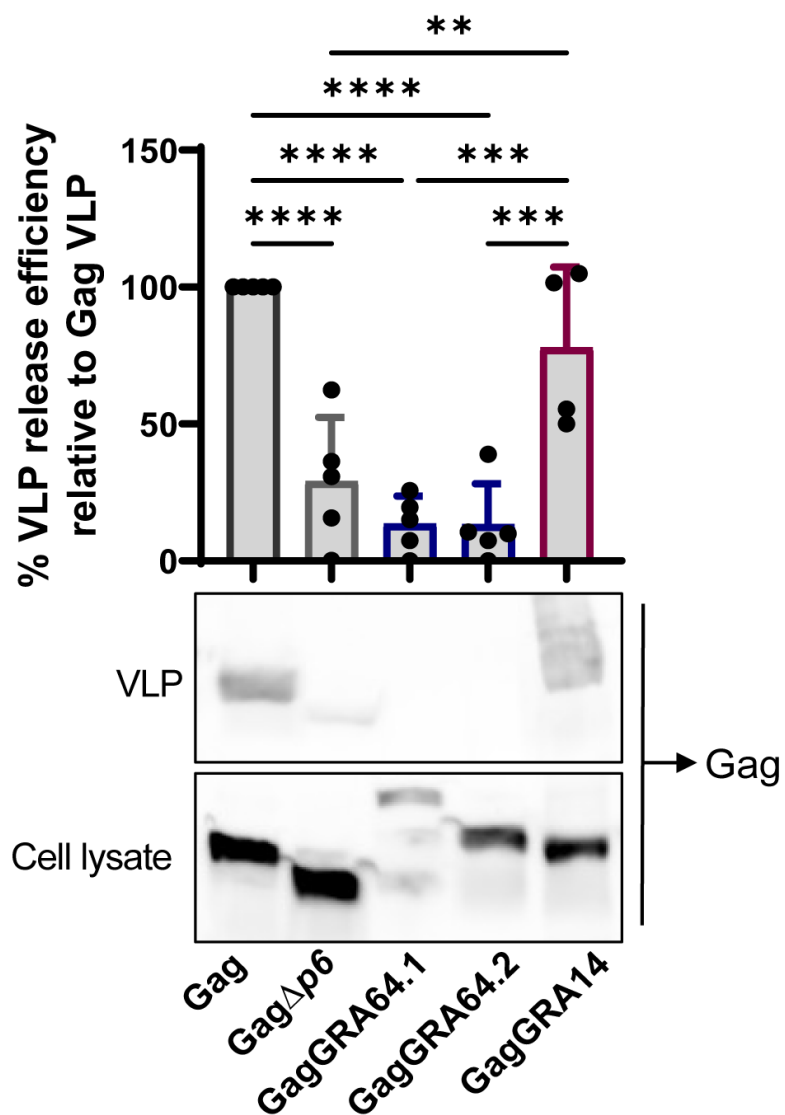

**B**

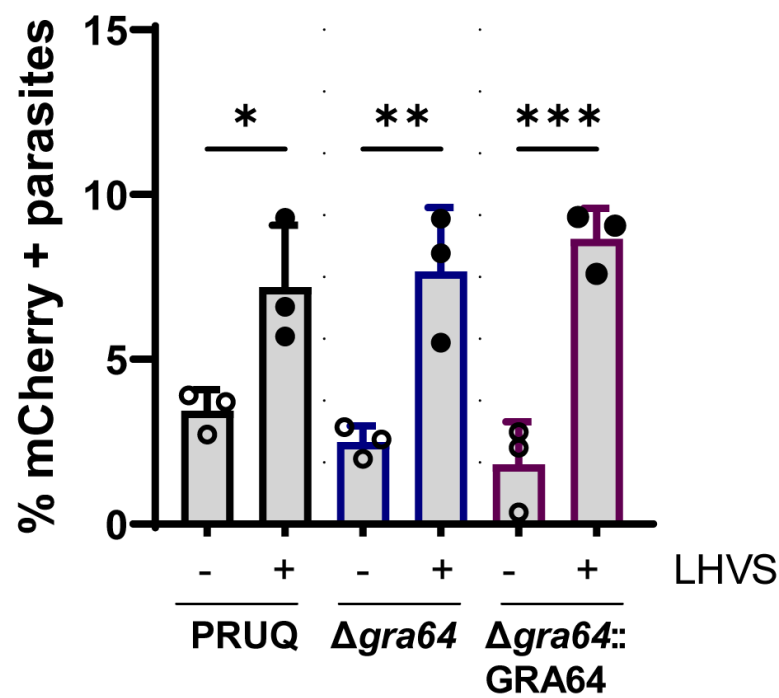

Source: https://www.biorxiv.org/content/biorxiv/early/2021/11/03/2021.11.02.467042.full.pdf
